# Supplementary material for: Transcriptome Signature of Vγ9Vδ2 T Cells Treated With Phosphoantigens and Notch Inhibitor Reveals Interplay Between TCR and Notch Signaling Pathways
Source: Front Immunol. 2021 Aug 30;12:660361. doi: 10.3389/fimmu.2021.660361 (PMC8435775; doi:10.3389/fimmu.2021.660361)
Supplement: Supplementary file 2 [file Table_1.xls]

## Sheet: Sheet9
Supplementary table 1
Sequences of the oligonucleotide primers used for gene expression
analysis (quantitative real-time PCR)
Gene name	Sequence
hIFNG_F_CDS	TGACCAGAGCATCCAAAAGA
hIFNG_R_CDS	CTCTTCGACCTCGAAACAGC
hCCR4_F_CDS	GTGGTGGTTCTGGTCCTGTT
hCCR4_R_CDS	AGCCCACCAAGTACATCCAG
hIL17a_F_CDS	ACCAATCCCAAAAGGTCCTC
hIL17a_R_CDS	GGGGACAGAGTTCATGTGGT
hIL17f_F_CDS	ATATTGGGGCTTGCCTTTCT
hIL17f_R_CDS	GTGTAATTCCAGGGGGAGGT
hBATF3_F_CDS	AGCCCTGAGGATGATGACAG
hBATF3_R_CDS	TTCAGTGCCTCTGTCAGGTG
hNFKB1_F_CDS	CCTGGATGACTCTTGGGAAA
hNFKB1_R_CDS	TCAGCCAGCTGTTTCATGTC
hTNFRSF4_CDS_F	CCTCAGAAGTGGGAGTGAGC
hTNFRSF4_CDS_R	AGATTGCGTCCGAGCTATTG
hIL4_CDS_F	GCCACCATGAGAAGGACACT
hIL4_CDS_R	ACTCTGGTTGGCTTCCTTCA
hIL10_CDS_F	TGCCTTCAGCAGAGTGAAGA
hIL10_CDS_R	GGTCTTGGTTCTCAGCTTGG
hIL6_CDS_F	TACCCCCAGGAGAAGATTCC
hIL6_CDS_R	TTTTCTGCCAGTGCCTCTTT
h_TNF_CDS_F	CAGAGGGCCTGTACCTCATC
h_TNF_CDS_R	GGAAGACCCCTCCCAGATAG
hSTAT5a_CDS_F	ACATTTGAGGAGCTGCGACT
hSTAT5a_CDS_R	CCTCCAGAGACACCTGCTTC

## Sheet: Sheet1
Supplementary table 2
Sample metrics
Sample name	Tissue	Treatment (72 hrs)	Read pairs (M)	%both surviving trimming	%overall mapping	% concordant reads	% multi-mapping
gd_rep1	Adult Blood	NA	42.6	98	93	88	12
gd_rep2	Adult Blood	NA	43	96	95	85	15
gd_rep3	Adult Blood	NA	44.1	96	93	89	12
gd_il2_rep1	Adult Blood	IL2	39.8	97	91	86	7
gd_il2_rep2	Adult Blood	IL2	40.1	95	92	86	11
gd_il2_rep3	Adult Blood	IL2	44	96	95	87	11
hd_rep1	Adult Blood	Il2+HDMAPP	52.5	97	94	91	23
hd_rep2	Adult Blood	Il2+HDMAPP	48.3	97	94	88	23
hd_rep3	Adult Blood	Il2+HDMAPP	50.2	98	92	86	22
ipp_rep1	Adult Blood	IL2+IPP	45	97	91	88	21
ipp_rep2	Adult Blood	IL2+IPP	50.5	97	93	87	24
ipp_rep3	Adult Blood	IL2+IPP	41.3	97	91	86	22
cd3_rep1	Adult Blood	IL2+anti-CD3	44.1	98	93	86	9
cd3_rep2	Adult Blood	IL2+anti-CD3	58.3	96	91	83	9
cd3_rep3	Adult Blood	IL2+anti-CD3	47.1	97	91	85	11
hd_gsi_rep1	Adult Blood	Il2+HDMAPP+GSI-X	39.5	98	95	90	28
hd_gsi_rep2	Adult Blood	Il2+HDMAPP+GSI-X	47.3	97	93	88	24
hd_gsi_rep3	Adult Blood	Il2+HDMAPP+GSI-X	40	95	93	86	24
ipp_gsi_rep1	Adult Blood	IL2+IPP+GSI-X	51.4	94	94	89	17
ipp_gsi_rep2	Adult Blood	IL2+IPP+GSI-X	52	97	94	88	18
ipp_gsi_rep3	Adult Blood	IL2+IPP+GSI-X	43	97	95	84	17
cd3_gsi_rep1	Adult Blood	IL2+anti-CD3+GSI-X	64	95	93	84	23
cd3_gsi_rep2	Adult Blood	IL2+anti-CD3+GSI-X	40.2	98	94	84	23
cd3_gsi_rep3	Adult Blood	IL2+anti-CD3+GSI-X	56	97	91	82	21

## Sheet: Sheet2
Supplementary table 3
DGEs FC>0.5, FDR<0.05
IL2 vs Gamma delta
Gene	baseMean	log2FoldChange	updown	FDR
IL17F	57.2523	8.49368	up	0.0187219
LOC105372651	29.9302	5.4211	up	0.00897332
LINC02806	6.59788	5.35591	up	0.00244108
IL1A	35.6153	4.57371	up	6.40936e-05
ADGRL2	12.0466	4.37944	up	0.0121871
CCL17	481.592	4.13428	up	0.00449132
IL5	53.6724	3.95709	up	3.64428e-05
ENPEP	7.21346	3.94073	up	0.0103171
IL4	47.704	3.85892	up	3.90615e-05
DNAJC12	63.3667	3.7464	up	0.0272569
C7orf57	66.3786	3.70668	up	3.00339e-06
NEIL3	86.5977	3.57196	up	2.13132e-12
PIMREG	11.1128	3.53407	up	0.000942608
LIF	45.56	3.38998	up	1.15557e-07
LOC101927851	6.53097	3.28448	up	0.0161754
LOC107985455	7.7211	3.26976	up	0.0181524
LOC105374263	23.2054	3.22788	up	7.85733e-06
EEF1A2	8.51871	3.20983	up	0.0213897
CDC45	715.918	3.1845	up	0.00289902
ANKRD35	14.1956	3.18334	up	0.00147477
CDK1	1473.96	3.16865	up	4.25104e-09
HHLA2	50.8082	3.15621	up	4.48346e-06
LOC105379176	26.3472	3.15442	up	0.000719638
HJURP	369.92	3.10785	up	2.02059e-10
CDC25C	81.2978	3.09944	up	1.06953e-08
SKA3	453.599	3.09542	up	2.08329e-07
CSF2	3278.61	3.09462	up	0.0160627
IL2	21.3377	3.07859	up	0.000669457
PBK	288.519	3.06987	up	1.91862e-09
MND1	161.771	3.0353	up	1.89352e-07
PCLAF	773.858	2.9856	up	8.61593e-08
CENPW	308.656	2.98269	up	1.10775e-08
KIF15	415.293	2.9814	up	9.74015e-10
TIMD4	30.1932	2.96697	up	0.000114196
OSBPL6	8.7585	2.96674	up	0.00653533
ANLN	249.844	2.95307	up	3.14719e-06
CKAP2L	277.087	2.91353	up	5.92227e-11
HMMR-AS1	61.2988	2.91215	up	5.83047e-08
UBE2C	581.035	2.90927	up	1.75569e-06
NEK2	154.27	2.90523	up	4.19575e-09
DEPDC1B	241.506	2.8976	up	4.57817e-12
RRM2	2996.13	2.8942	up	0.0128323
MCM10	650.386	2.89071	up	0.00627124
SPC25	279.646	2.8829	up	1.2359e-11
SOCS2-AS1	10.9013	2.87826	up	0.00436243
LOC105373424	10.5542	2.86263	up	0.00792136
DTL	922.727	2.84547	up	0.00323226
SHCBP1	420.015	2.84298	up	1.18745e-08
TTK	443.477	2.83945	up	2.25715e-12
H2BC9	32.7614	2.83933	up	3.56963e-05
UBE2T	798.634	2.83029	up	4.62083e-08
DEPDC1	136.013	2.81121	up	7.86242e-06
LOC101927267	8.20733	2.80464	up	0.0121594
ESCO2	458.644	2.8009	up	3.68192e-11
HMMR	722.545	2.79895	up	2.15809e-15
CDC6	819.059	2.79194	up	0.00393515
LOC107985848	16.8047	2.78896	up	0.000358294
LOC145694	6.8192	2.78792	up	0.0416982
LINC00484	9.27608	2.78623	up	0.0425094
KIF23	442.789	2.78371	up	3.2471e-08
DLGAP5	488.87	2.77996	up	1.62944e-11
AURKB	232.851	2.77203	up	6.50747e-08
CTH	153.805	2.77089	up	4.88291e-08
NUF2	419.919	2.73966	up	1.29247e-08
DSCC1	312.495	2.73692	up	4.12829e-06
ASPM	556.255	2.71485	up	2.94214e-10
POLE2	469.33	2.7099	up	5.41536e-06
NCAPG	845.112	2.70692	up	7.36864e-09
DIAPH3	141.395	2.70123	up	1.5974e-05
EXO1	526.186	2.69158	up	3.3108e-06
ZWINT	1020.23	2.68628	up	1.59788e-08
CEP55	452.635	2.67812	up	6.30693e-09
MELK	540.618	2.67422	up	9.55403e-06
LINC01132	31.2448	2.67334	up	0.000270087
LOC107984202	30.5197	2.67035	up	0.000228378
GINS2	732.812	2.66722	up	5.53014e-06
BUB1B	482.426	2.66591	up	6.93138e-12
TAGLN3	7.45386	2.66581	up	0.0301821
CHEK1	1319.02	2.66125	up	0.00464988
CCNB2	366.667	2.65091	up	1.31291e-09
RAD51AP1	401.405	2.65021	up	5.15079e-10
MAD2L1	1206.41	2.65008	up	6.93138e-12
CCNB1	1030.58	2.64817	up	8.3365e-10
DMC1	54.8198	2.64055	up	0.00195314
PARPBP	465.249	2.63764	up	0.024342
BUB1	798.967	2.63527	up	1.4682e-08
KIF4A	200.511	2.63259	up	7.96796e-09
CCNA2	872.923	2.62628	up	1.2143e-08
LOC105372753	35.9694	2.61828	up	0.004796
PLK4	525.463	2.61753	up	1.13073e-09
CENPA	75.5341	2.60895	up	0.000292358
KIF2C	445.556	2.60376	up	3.46618e-07
CDK6-AS1	21.5692	2.59948	up	0.00260519
CDKN3	424.019	2.58776	up	4.58497e-08
LOC105370537	24.9375	2.58397	up	0.00436243
SNORD14C	36.0734	2.56742	up	1.68774e-05
LOC101929510	14.6106	2.5609	up	0.0025734
KIF20A	192.548	2.55565	up	1.29247e-08
FBXO43	33.2458	2.54242	up	4.48984e-05
OTOA	20.0798	2.53466	up	0.00079744
BIRC5	503.495	2.53091	up	5.89718e-06
TOP2A	2078	2.52442	up	5.34953e-11
LOC105369177	9.17571	2.51706	up	0.0419323
CD80	245.892	2.51691	up	7.11636e-09
TPX2	603.665	2.50956	up	7.5225e-07
CDCA3	188.092	2.50613	up	2.81118e-08
CKS1B	1185.19	2.50324	up	2.10423e-06
LOC107984130	26.952	2.49986	up	0.000361394
RIBC2	20.6512	2.49712	up	0.0258168
CDC25A	229.336	2.49589	up	0.0483146
NUSAP1	1190.53	2.4951	up	3.77767e-09
SKA1	188.33	2.4945	up	2.43332e-05
SHROOM1	8.3997	2.4817	up	0.045904
RAD51	270.006	2.47678	up	4.09547e-06
KIF14	127.516	2.47511	up	3.6681e-06
BATF3	316.621	2.45762	up	6.40077e-07
ECT2	420.09	2.4536	up	2.21271e-11
TRIP13	309.924	2.44276	up	9.51864e-05
E2F8	111.188	2.43813	up	6.40571e-06
CKS2	1177.92	2.43504	up	1.2143e-08
CENPU	1248.09	2.43183	up	3.45044e-06
TROAP	120.667	2.42332	up	7.4906e-05
PRC1	511.488	2.41749	up	2.21047e-12
CCNE2	271.186	2.41544	up	4.70788e-11
CDCA2	195.822	2.4044	up	7.78426e-08
KNL1	455.947	2.39981	up	1.42394e-08
IL2RA	15677.1	2.39788	up	0.0484744
CDCA5	331.308	2.39462	up	0.0258598
DDIAS	344.122	2.39453	up	3.2471e-08
LINC01871	2582.21	2.39342	up	9.51043e-08
FAM72C	48.7692	2.37462	up	2.31382e-06
UNQ6494	230.42	2.37206	up	4.5261e-05
NDC80	657.767	2.3647	up	3.59722e-14
CENPE	428.069	2.36357	up	4.65264e-11
HSPA4L	14.1181	2.36039	up	0.0412345
SPC24	88.4802	2.35354	up	7.43644e-05
MTFR2	214.811	2.34829	up	2.16328e-09
CHAC2	354.895	2.34817	up	9.90095e-06
OIP5	128.027	2.34562	up	0.000240134
SNORD86	52.4507	2.34558	up	1.09749e-05
PRKCE	286.387	2.33835	up	0.000105332
LOC105375728	23.432	2.33349	up	0.00184427
TK1	290.75	2.33227	up	2.11604e-05
SNORA105A	36.8339	2.33182	up	2.60269e-05
SGO1-AS1	24.2646	2.32734	up	0.000208497
AURKA	442.587	2.32296	up	7.02178e-09
PCNA	7106.26	2.3224	up	3.08601e-07
KIF18B	69.6803	2.3217	up	0.000114204
SGO1	163.311	2.32127	up	8.38106e-09
ERCC6L	196.037	2.31788	up	2.63313e-06
GGH	325.236	2.31635	up	1.74579e-10
IGF1	52.8861	2.31028	up	0.00682407
GMNN	740.666	2.30547	up	5.75495e-08
MIR155HG	5250.31	2.3034	up	6.04679e-07
CENPF	709.594	2.29926	up	5.15079e-10
ORC6	287.851	2.29864	up	0.000332667
ENPP1	12.337	2.29215	up	0.0105269
FEN1	1432.9	2.28826	up	6.98809e-07
CCDC150	58.1741	2.28746	up	9.96368e-07
HMGB3	243.345	2.28293	up	3.27533e-05
XRCC2	195.5	2.27886	up	4.03151e-06
LOC107984551	74.4209	2.2759	up	0.00114727
LOC107984408	8.95481	2.27275	up	0.0396229
TYMS	1167.92	2.27162	up	0.0339359
SPAG5	757.877	2.27112	up	5.45353e-09
IL3	17.2488	2.26972	up	0.00873465
GINS1	322.054	2.2552	up	7.68536e-05
POLQ	201.162	2.24663	up	2.17572e-06
ORC1	279.534	2.24091	up	9.0772e-05
POC1A	122.509	2.23792	up	6.78096e-05
NT5DC4	16.94	2.2369	up	0.0113955
TYMSOS	70.4107	2.23488	up	0.00943481
TEX48	24.6087	2.23421	up	0.00463937
TUBA1B	19899	2.22606	up	1.04946e-07
SLC27A2	218.706	2.22363	up	3.08601e-07
MKI67	895.01	2.22057	up	2.48728e-06
CIP2A	568.61	2.21996	up	1.79748e-07
HPDL	86.9984	2.21659	up	0.00525585
NME1	1911.46	2.21605	up	3.41624e-06
ME3	48.589	2.21373	up	1.66364e-06
KIF18A	227.761	2.21214	up	9.33539e-11
CENPI	134.979	2.21174	up	8.09982e-08
PCNA-AS1	1053.5	2.21043	up	1.35593e-06
PRC1-AS1	48.9809	2.20235	up	4.61741e-06
FAM72B	72.129	2.19957	up	6.27006e-06
E2F7	103.164	2.18834	up	9.17992e-05
MCM4	2017.65	2.18795	up	8.72031e-05
TIPIN	686.556	2.1871	up	4.31377e-07
PTTG1	704.125	2.18623	up	3.418e-07
KIF11	470.083	2.17899	up	8.72776e-06
STMN1	3875.33	2.17089	up	2.21047e-12
MT1E	153.454	2.16377	up	0.00085832
RFC3	868.798	2.15914	up	1.62944e-11
CCL4	26774.2	2.14455	up	0.0191445
CDCA7	488.405	2.14264	up	1.35593e-06
SNORA105B	665.632	2.13784	up	1.23792e-06
KNSTRN	461.928	2.13681	up	6.31579e-09
FAM72D	77.8259	2.13517	up	1.29906e-05
CCN6	19.7445	2.12929	up	0.00430283
NCAPH	455.333	2.11884	up	6.91604e-09
LINC01943	1155.08	2.11683	up	0.000435117
NUDT8	41.3756	2.11397	up	0.00291927
KIFC1	195.155	2.11364	up	6.06366e-05
SNORA9	26.9121	2.1107	up	0.00567821
HROB	37.4642	2.1098	up	0.000315196
BRIP1	167.811	2.10834	up	1.31291e-09
PRR11	251.546	2.10058	up	3.21058e-06
PSAT1	2039.18	2.09992	up	2.93723e-05
GNG8	432.035	2.09967	up	3.82112e-05
DNA2	389.491	2.09881	up	1.2143e-08
LOC100507103	82.9836	2.09784	up	0.00156316
GZMA	2155.3	2.08927	up	1.13629e-06
DPP4-DT	44.5827	2.08674	up	8.70837e-05
EME1	166.879	2.08655	up	0.000190315
SNORD60	10.7283	2.08543	up	0.0300123
HSPE1	2650.01	2.08092	up	7.40704e-07
LOC107984201	569.955	2.07343	up	0.00120888
LOC107986898	8.54491	2.07112	up	0.0445961
PAICS	5394.26	2.06659	up	1.41149e-06
GINS3	321.038	2.06159	up	3.03395e-06
RAD54B	317.71	2.06	up	4.42312e-07
CDT1	80.1932	2.05487	up	0.00928375
SNORD49A	13.0951	2.05093	up	0.0196376
C1orf53	19.6759	2.05014	up	0.0189637
HELLS	734.923	2.04211	up	4.85717e-05
NPM3	1083.12	2.03781	up	2.60269e-05
SAPCD2	47.1322	2.03476	up	0.0488557
DHFR	1282.08	2.02969	up	1.19308e-05
PINLYP	51.909	2.02933	up	0.0137508
HECW2	11.9745	2.0282	up	0.0484163
RPL22L1	2193.51	2.02497	up	1.13381e-09
CENPN	880.083	2.02055	up	5.41536e-06
TUBA1C	4661.62	2.01828	up	3.82624e-09
NET1	275.202	2.01605	up	2.37713e-07
HP09053	69.3504	2.01535	up	2.60269e-05
SLIRP	846.231	2.00889	up	1.81346e-07
WDHD1	792.845	2.00653	up	3.17487e-07
SNORA7A	16.5681	2.00537	up	0.00724101
TEDC2	40.4681	1.99923	up	0.0490729
ATAD2	1956.78	1.99744	up	2.05988e-11
SNHG15	1969.89	1.99507	up	1.23792e-06
RBBP8	1141.37	1.9767	up	4.88661e-09
GCAT	52.9288	1.97218	up	0.00502884
CMSS1	898.076	1.97217	up	3.08601e-07
SNORD83A	12.4001	1.96537	up	0.0239776
CCNI2	58.7676	1.96309	up	0.000102502
SNORD30	10.561	1.96294	up	0.0328274
LOC105372310	55.125	1.9623	up	1.3469e-05
CHRM3-AS2	106.871	1.95709	up	0.0107395
CDCA8	214.736	1.95545	up	0.000108053
FAM111B	794.602	1.94951	up	1.2359e-11
CREM	2615.36	1.94848	up	2.21044e-08
MB	18.0735	1.94534	up	0.0121925
AFAP1L2	152.67	1.94258	up	0.000236106
SNRPD1	2788.14	1.94157	up	5.44767e-07
APOBEC3B	71.5746	1.93612	up	0.000170692
MTHFD2	6442.86	1.93569	up	1.02251e-05
CYCS	6399.19	1.93528	up	6.81567e-11
HSPD1	12098.2	1.93336	up	6.72261e-07
RRM1	3022.33	1.93084	up	1.01693e-07
BRCA1	538.779	1.92368	up	9.77155e-06
NCR3	1159.25	1.92282	up	2.1365e-07
CCDC58	675.389	1.92116	up	1.70539e-06
IQCG	664.212	1.92034	up	3.9252e-05
TEX30	782.02	1.92004	up	1.57081e-05
LINC00158	63.8483	1.91906	up	0.000583225
EIF2B3	734.621	1.91819	up	1.20649e-07
EPAS1	75.4674	1.91795	up	0.0209228
RFC4	1295.46	1.91722	up	3.82606e-08
E2F2	58.0891	1.91104	up	0.0045944
ACOT7	319.29	1.90685	up	0.00309208
POLR3K	694.617	1.90486	up	2.03258e-08
TMEM106C	1929.95	1.90009	up	2.8297e-07
SNORA103	12.3019	1.89964	up	0.0237652
POGLUT2	179.165	1.89884	up	0.00348331
SLC29A1	282.203	1.89787	up	5.70603e-05
DUT	2088.61	1.89661	up	5.44767e-07
H2AZ1	5318.33	1.89492	up	7.7777e-11
OXCT1-AS1	20.6634	1.89206	up	0.019836
RAD54L	99.2349	1.8919	up	0.000370311
VRK1	1499.97	1.89012	up	2.81118e-08
GZMH	1760.06	1.8886	up	4.98287e-15
CENPH	572.89	1.88548	up	7.03056e-06
CHAF1B	291.162	1.88017	up	0.000163023
LOC107984667	61.3625	1.8789	up	0.00352586
ARHGAP11A	287.965	1.87434	up	3.38196e-06
STIL	244.463	1.8725	up	0.000247543
MCM6	3844.92	1.86627	up	1.71349e-05
CASP3	3807.1	1.86409	up	5.27858e-07
PCCA-DT	39.6975	1.86406	up	0.00364542
MRPL17	1030.34	1.86178	up	5.36159e-06
KPNA2	3173.59	1.86003	up	6.06253e-07
HAVCR2	315.884	1.85756	up	0.000887868
BUB1B-PAK6	27.3458	1.85378	up	0.00300697
FAM216A	359.775	1.85157	up	6.02994e-06
NDFIP2	1538.23	1.85154	up	1.03294e-06
PRIM1	1035.8	1.85037	up	2.23287e-06
ATP8B4	473.808	1.8399	up	3.07539e-05
EEF1E1	783.029	1.83892	up	2.11587e-06
SOCAR	77.6686	1.83829	up	0.0196479
POLR3G	271.078	1.83594	up	1.06069e-07
CDC20	310.289	1.83275	up	0.000389262
LOC107985055	17.727	1.8316	up	0.0203335
LIMA1	1158.04	1.82678	up	7.53064e-07
C12orf73	360.72	1.82417	up	1.81346e-07
NUP37	1088.23	1.82023	up	2.13075e-08
CBS	18.511	1.81977	up	0.0216583
C17orf58	188.079	1.81729	up	0.00277064
REXO5	72.0899	1.81653	up	0.000118982
SLC16A1	1258.6	1.81434	up	2.42623e-07
GINS4	290.192	1.81018	up	9.08984e-05
DDX11-AS1	12.6126	1.80597	up	0.0328464
CENPQ	419.761	1.79886	up	3.79031e-07
RNASEH2A	496.865	1.79832	up	1.04051e-05
MAGOHB	974.583	1.79764	up	1.98975e-11
NEDD4	215.842	1.79697	up	9.94774e-06
PKMYT1	95.328	1.79468	up	0.0162996
UBXN10-AS1	25.0857	1.79371	up	0.0143667
SNORD80	55.3232	1.79281	up	0.000311838
NOP56	5095.86	1.7923	up	2.19142e-07
LRR1	621.304	1.79078	up	4.39791e-06
FABP5	2089.33	1.78806	up	2.81118e-08
AIF1	53.3235	1.78568	up	0.00288874
TICRR	39.1737	1.78046	up	0.024016
EBP	820.186	1.77564	up	8.40802e-07
SNORD26	31.243	1.7737	up	0.00689226
GSTA4	56.4057	1.76631	up	0.00103722
RAN	16172.3	1.76534	up	2.93142e-07
PPA1	4832.86	1.7595	up	1.16424e-08
FANCI	1520.93	1.75732	up	2.24101e-08
NAMPT	11540.6	1.75508	up	0.00197262
BOLA3	538.747	1.75483	up	4.43794e-06
CMAHP	1035.74	1.754	up	4.39791e-06
APOO	227.055	1.75265	up	8.14206e-07
GTSE1	115.392	1.75239	up	0.00273608
HMGB2	5755.47	1.74988	up	1.08978e-11
MIR155	122.67	1.74982	up	0.00788976
SGO2	528.325	1.74614	up	1.38315e-09
TUBB	14895.2	1.74257	up	5.08772e-06
FRMD4B	365.224	1.74108	up	0.00280605
SNRPG	2410.99	1.73942	up	1.80578e-05
MIR17HG	202.38	1.73664	up	5.10865e-05
WDR62	71.6662	1.73648	up	0.000176179
HOMER2	100.69	1.73589	up	0.00122973
TOMM5	1961.66	1.73535	up	7.45683e-07
SNRPE	2329.37	1.73344	up	1.50395e-06
EZH2	1191.63	1.73076	up	5.70238e-05
CCDC34	208.491	1.72597	up	0.000110755
NPM1	34313.1	1.72501	up	5.54539e-07
LCTL	89.6789	1.72265	up	1.23549e-05
PSMG1	768.258	1.71378	up	1.79923e-05
EXOSC8	1993.32	1.71181	up	2.41389e-07
FKBP7	65.9456	1.70499	up	0.000891381
RPF2	1317.75	1.70473	up	4.56296e-05
BRIX1	2042.45	1.70038	up	1.36246e-07
BLM	702.926	1.69902	up	8.60822e-08
COQ3	254.689	1.69893	up	4.57005e-06
ICOS	1930.1	1.6982	up	7.51401e-05
LOC100506274	37.2219	1.6916	up	0.0231609
CCDC167	798.612	1.68956	up	3.29389e-06
RACGAP1	981.013	1.68875	up	6.07844e-08
FARSB	2007.8	1.68449	up	2.85406e-07
CENPK	735.723	1.68322	up	2.27208e-10
TFRC	5416.05	1.68127	up	2.01126e-06
PRDX4	753.668	1.67996	up	2.85895e-06
FAM72A	92.3877	1.67893	up	4.90964e-05
NME1-NME2	4297.93	1.67796	up	9.69083e-06
CTPS1	1200.27	1.6761	up	0.000319884
TMEM97	566.087	1.67513	up	4.62594e-06
CISD1	569.095	1.67363	up	6.91145e-06
RPP40	201.015	1.67307	up	7.01354e-06
EVI5	160.409	1.67099	up	0.0193203
TNFSF10	2428.73	1.67008	up	0.000108165
LOC112268048	107.369	1.66603	up	4.34528e-05
SMC2	1514.9	1.66474	up	4.50444e-09
NOP16	1655.09	1.66372	up	4.1748e-06
PUM3	2078.82	1.66298	up	2.17572e-06
BZW2	1325.48	1.66257	up	2.36547e-08
DLEU1	346.139	1.66072	up	1.50395e-06
C20orf197	27.1849	1.66053	up	0.00869327
ZWILCH	911.433	1.66012	up	2.28459e-08
PSMC3IP	262.433	1.65905	up	1.50157e-05
NEFH	146.554	1.65631	up	0.000698556
FAH	303.186	1.65381	up	2.60269e-05
PPIL1	1434.8	1.64793	up	6.16248e-07
MRPL15	1438.92	1.64725	up	5.48448e-07
ENO1	24643.6	1.64465	up	0.000361394
MRPL3	3422.39	1.64456	up	1.50395e-06
FH	1725.73	1.64312	up	1.57502e-06
CSE1L	3806.2	1.64254	up	2.95366e-08
C19orf48	967.889	1.64151	up	0.00121231
EED	2324.58	1.63975	up	6.29637e-05
C9orf40	185.235	1.63774	up	7.26797e-05
MRTO4	1579.7	1.63708	up	0.000104758
ERI2	161.333	1.63657	up	2.81118e-08
HSF5	89.7859	1.63643	up	0.0030095
SVIL2P	54.73	1.63519	up	0.012098
RAD51C	834.642	1.63339	up	3.80595e-06
NUDCD1	1237.8	1.63017	up	9.51043e-08
SFXN4	510	1.62889	up	0.000125387
LOC107984858	42.166	1.62763	up	0.0063818
EEF1AKMT4-ECE2	43.754	1.62657	up	0.0360567
COX17	1238.56	1.62523	up	2.87195e-06
SNORD79	49.3215	1.62498	up	0.000562348
CXCL10	548.401	1.62364	up	0.000121137
BMP6	47.1544	1.62229	up	0.00318055
UBXN10	41.2772	1.6215	up	0.00325832
RPL26L1	687.547	1.62115	up	1.17326e-05
PLK1	75.9961	1.6209	up	0.00589403
PRRG4	42.2343	1.61995	up	0.0170476
HSPE1-MOB4	2189.26	1.61831	up	1.66293e-07
NUP35	630.311	1.61828	up	3.33235e-06
MRPL12	1218.06	1.61772	up	0.00178105
PNP	2582.69	1.61542	up	9.64704e-10
NIFK	1938.87	1.61494	up	9.70886e-08
SLC39A8	1048.21	1.6091	up	0.00108275
EEF1AKMT4	97.5053	1.60737	up	0.0145215
NFIL3	434.132	1.60682	up	0.00686963
MRPL11	1503.22	1.60629	up	2.48728e-06
SPR	24.4691	1.60523	up	0.0379714
PDCD2L	339.991	1.60288	up	3.28968e-05
ITGB3BP	642.826	1.60213	up	2.06718e-06
DTYMK	564.056	1.60213	up	0.00217495
DCTPP1	992.444	1.6015	up	0.000629281
GLRX2	279.446	1.59973	up	7.35224e-05
CCT2	7312.63	1.59957	up	1.63609e-07
MCM7	2520.74	1.59862	up	5.99503e-05
PSMD14	2762.65	1.59781	up	2.7454e-06
CENPM	321.838	1.59649	up	0.000483484
CCT5	7377.07	1.59489	up	9.42633e-06
TIMM10	936.205	1.59193	up	1.33047e-06
METTL1	477.081	1.58892	up	0.000361614
GGCT	863.16	1.58867	up	3.44456e-05
LST1	383.851	1.58426	up	1.48635e-05
C5orf30	171.995	1.58151	up	0.000340471
HSP90AA1	40225	1.57989	up	1.02205e-06
MZT1	687.088	1.57963	up	1.52699e-12
SCD	357.099	1.57803	up	3.37083e-06
MYB	571.885	1.57679	up	0.000508753
RUVBL1	1725.65	1.57669	up	2.47066e-07
SAMSN1	4193.91	1.57627	up	5.48448e-07
SNRPF	1419.38	1.57593	up	3.69983e-06
RHEBL1	95.8666	1.57417	up	1.03785e-05
NCAPG2	584.295	1.56941	up	1.08038e-08
STRIP2	145.392	1.56758	up	0.0493378
ARNTL2	379.26	1.56658	up	0.00192861
MT1X	306.713	1.5648	up	7.76524e-05
PMAIP1	2138.6	1.56377	up	2.69369e-05
MRPL13	1589.18	1.56326	up	2.96549e-05
DHRS7B	262.85	1.56104	up	0.000259228
PRDX3	3359.24	1.56003	up	2.27079e-08
SLC19A1	61.2448	1.55836	up	0.0319191
PDSS1	362.002	1.55737	up	2.40783e-06
TIMM17A	1919.9	1.55701	up	2.2523e-06
HYPK	467.137	1.5565	up	8.06111e-06
AIMP2	682.506	1.55476	up	2.74071e-05
NUDT1	464.224	1.55221	up	0.000240634
OTOAP1	17.8823	1.5518	up	0.0330598
LDHA	19184.2	1.5517	up	3.67748e-05
GNL3	4029.52	1.55059	up	4.48151e-08
UCHL3	424.013	1.5504	up	5.99503e-05
TH2LCRR	102.704	1.55036	up	0.000271933
TIMM21	695.732	1.54982	up	4.67791e-08
NDUFAB1	1726.71	1.54915	up	6.63606e-06
BAG2	473.711	1.54858	up	6.02994e-06
UQCRQ	1680.5	1.54841	up	8.97479e-06
CCND2	2554.18	1.54743	up	0.0126188
LSM5	1339.92	1.54731	up	5.2751e-07
MRPL1	1114.92	1.54536	up	1.73746e-07
IFI27L1	152.444	1.54437	up	0.000365421
ASNS	1388.16	1.54402	up	1.84126e-07
LMO7-AS1	21.6657	1.54241	up	0.039275
NME2	3337.85	1.54144	up	2.9049e-05
ZNF367	233.626	1.54066	up	0.000795022
ELL2	764.715	1.53785	up	6.40077e-07
MRPS17	550.265	1.53771	up	9.24436e-05
E2F1	231.759	1.53741	up	0.0200433
CHCHD4	307.886	1.5366	up	8.42502e-06
CAVIN3	29.9415	1.53646	up	0.0309772
CCT8	9253.93	1.53519	up	2.17572e-06
MYBL2	168.937	1.53383	up	0.00297151
PSPH	139.483	1.53061	up	0.0022746
PPIA	18311.8	1.52888	up	1.14765e-07
DNAJC9	1233.28	1.52848	up	2.6548e-06
POLR2H	1148.84	1.52675	up	0.000121021
EIF1AY	1379.77	1.52568	up	1.38614e-06
UHRF1	237.694	1.52537	up	0.00529137
HSPA8	59691	1.52244	up	1.51027e-07
SLC25A19	519.371	1.52239	up	4.43691e-05
RFC5	900.14	1.5199	up	5.73942e-07
PTS	298.865	1.51899	up	7.06047e-05
MRPS12	1007.46	1.51876	up	2.82094e-05
EBNA1BP2	1790.74	1.51613	up	7.15139e-05
PA2G4	4854.66	1.51145	up	3.525e-05
MPHOSPH6	698.616	1.51114	up	7.56538e-05
BNIP1	393.221	1.51079	up	0.000114836
CZ1P-ASNS	1411.24	1.50996	up	2.32002e-07
LOC107986126	136.876	1.50687	up	0.0279777
HPRT1	1033.8	1.50595	up	4.15153e-08
NT5DC2	191.191	1.50385	up	0.00354923
ACAT1	1231.17	1.50323	up	2.01909e-07
EXOSC3	764.113	1.50226	up	8.06111e-06
SNORA18	36.8731	1.50065	up	0.0113506
ASF1B	161.141	1.50017	up	0.0330872
PSMB5	1254.6	1.49923	up	0.000123374
GPR171	7171.52	1.49825	up	3.97331e-08
SLC25A5	6190.36	1.49801	up	1.38614e-06
SLC43A3	980.677	1.4977	up	0.000747782
FAM136A	1324.61	1.49767	up	4.12478e-05
RPS26	1111.64	1.49761	up	2.04176e-05
ALDH1B1	104.237	1.4965	up	0.00138646
ZNF593	266.404	1.49582	up	0.000699208
NOP58	5243.76	1.49579	up	2.09782e-06
UQCC2	598.517	1.49481	up	0.000590932
YRDC	581.777	1.49468	up	0.0021302
PSTPIP2	273.755	1.49445	up	8.19705e-05
POMP	2842.07	1.49398	up	1.94699e-05
UNG	685.068	1.49373	up	0.00106283
PHB	3549.57	1.49356	up	4.95712e-05
KIF3A	975.516	1.49325	up	2.16055e-06
LRRC20	38.1179	1.49307	up	0.0170232
TRAIP	88.9601	1.49252	up	0.0011268
LOC105378047	94.599	1.49236	up	0.00570306
SNORD81	53.7818	1.49234	up	0.000504809
WDR76	481.475	1.49073	up	0.00112326
DEPDC7	23.8247	1.49025	up	0.0282283
SCML2	46.3761	1.48922	up	0.0125421
MTHFD1	1338.92	1.48895	up	1.49767e-06
MRPL47	1640.7	1.48831	up	4.32164e-06
KLHL23	61.9799	1.48798	up	0.00339821
GPN3	603.98	1.48789	up	1.14515e-05
SNORA40	97.1165	1.48609	up	0.000248009
EIF4A1	9316.3	1.48589	up	1.08326e-05
CENPX	567.869	1.48461	up	8.19966e-05
UTP11	1239.42	1.48276	up	9.41991e-05
SUB1	5763.56	1.48227	up	1.51027e-07
MRPL24	1332.6	1.48196	up	0.000325167
TIMM23	1491.46	1.48077	up	3.27758e-05
HIRIP3	361.364	1.47999	up	0.00271273
TPI1	9166.79	1.47786	up	1.77114e-05
WDR12	1337.93	1.47774	up	3.25989e-05
UCK2	533.915	1.47748	up	0.00963127
GRPEL1	1274.15	1.47522	up	2.23316e-05
MRPL27	610.598	1.47514	up	0.000847683
HMSD	101.641	1.47449	up	0.00496664
MRPS15	1437.62	1.47372	up	2.83412e-05
TCF19	482.629	1.47263	up	0.00284007
IVNS1ABP	6957.44	1.47231	up	0.00157175
NDUFAF2	543.023	1.47198	up	2.60269e-05
FANCD2	546.887	1.47039	up	1.50395e-06
RANBP1	2028.59	1.46907	up	0.00113636
SNORD47	148.714	1.46887	up	6.76117e-05
BTG3	643.864	1.46862	up	2.95844e-05
ZNF788P	67.487	1.46837	up	0.0208379
EXOSC9	1777.96	1.46783	up	2.21044e-08
YWHAE	4564.19	1.46712	up	0.000107063
MRPL36	612.726	1.46565	up	7.68536e-05
PRDX1	8110.62	1.46389	up	3.84294e-06
MMD	375.506	1.46339	up	6.31409e-06
LOC100287042	179.621	1.46149	up	0.000255216
MNAT1	582.783	1.46086	up	1.5165e-05
BOLA2B	769.431	1.45961	up	0.000453697
ENOSF1	1251.62	1.45854	up	4.16262e-05
GTPBP4	3109.63	1.45623	up	0.000107803
PPAT	680.755	1.45367	up	5.4342e-06
PDCD5	1763.67	1.45344	up	1.13474e-05
TMEM237	301.999	1.45329	up	3.41624e-06
C4orf46	424.641	1.45288	up	3.66767e-05
LOC100288637	75.2617	1.45283	up	0.000362257
WDR75	2649.25	1.45169	up	2.05849e-07
NDUFAF4	783.853	1.45036	up	2.23047e-06
SPDL1	645.972	1.44996	up	5.5828e-06
LOC105374114	207.164	1.44963	up	2.59544e-05
FUT8	491.329	1.44907	up	0.000522227
SENP3-EIF4A1	9648.32	1.44894	up	1.8753e-05
LIN9	305.419	1.44825	up	2.5152e-06
NDUFA7	879.174	1.44708	up	2.79537e-05
TXN	7367.11	1.44691	up	0.000150999
PHF5A	1234.62	1.44549	up	2.10811e-06
PAM16	136.481	1.44363	up	0.000360924
CTNNAL1	373.261	1.44359	up	0.00314672
CXCL9	1384.01	1.44332	up	2.63636e-09
ATP5MC3	3260.56	1.44203	up	1.65712e-06
STOML2	2361.45	1.44156	up	1.05237e-05
GEMIN6	492.094	1.44103	up	0.00014704
MTBP	222.934	1.44066	up	6.19623e-05
EIF2S1	3638.44	1.4403	up	4.07103e-07
DCAF13	2296.21	1.44019	up	2.87997e-06
CHRNA5	41.2644	1.43902	up	0.0186407
MTLN	440.195	1.43899	up	0.000832941
SKA2	650.063	1.43887	up	3.71177e-08
CENPS	115.086	1.4357	up	0.00218583
MAIP1	395.145	1.43522	up	1.7269e-05
SNORA62	57.0736	1.43475	up	0.000550186
KNTC1	1107.82	1.43466	up	1.87088e-07
ID2	4758.63	1.43373	up	2.06392e-06
CBX3	6279.85	1.43368	up	1.39719e-08
MMACHC	1809.69	1.43259	up	1.36352e-05
MRPS23	1477.63	1.43246	up	9.42278e-06
NIT2	1209.12	1.4318	up	4.86669e-08
MRPL51	2004.08	1.43151	up	0.000288466
PFDN2	1101.53	1.43069	up	2.0248e-05
SCFD2	332.843	1.42969	up	4.42312e-07
CCNE1	134.473	1.42955	up	0.0119425
BPGM	818	1.42878	up	1.27993e-06
PINX1	591.657	1.42752	up	6.52254e-05
LMNB1	677.321	1.42683	up	0.000500931
MRPL21	832.875	1.42646	up	0.000215926
TCP1	5169.63	1.42611	up	8.31534e-05
TRMT10C	1534.21	1.42561	up	1.48159e-07
LSM3	1500.86	1.42473	up	8.96312e-06
C1QBP	2532.46	1.42423	up	0.00168947
PRSS23	383.215	1.42409	up	0.00330313
KIF20B	832.592	1.42286	up	1.92439e-08
RPA3	1339.71	1.42192	up	5.69864e-06
DERL3	25.853	1.42146	up	0.0281331
ULBP2	49.5342	1.41923	up	0.0313857
SLC4A10	286.346	1.41848	up	0.0421662
ALKBH2	301.714	1.41795	up	0.000188332
TWSG1	419.189	1.41737	up	0.000107803
AUNIP	115.074	1.41505	up	0.000646108
SNHG17	378.354	1.41498	up	1.07606e-05
DPCD	67.3743	1.41316	up	0.0031901
SLC25A5-AS1	543.234	1.41199	up	2.24879e-06
EXOSC7	729.87	1.41109	up	1.06107e-05
FBXO5	453.049	1.41074	up	4.56948e-08
IPO11-LRRC70	158.642	1.40963	up	5.25358e-05
DRG1	1685.15	1.40922	up	7.11631e-06
SEC61G	1513.73	1.40783	up	7.53351e-05
CACYBP	3563.53	1.40712	up	2.70433e-05
FAM83D	49.3937	1.40415	up	0.0161665
NOP10	2131.27	1.40398	up	1.91e-05
CCT6A	7992.69	1.4025	up	1.72375e-05
EEF1AKMT1	187.482	1.40187	up	0.000154176
MRPL35	1134.35	1.40167	up	0.000146623
CISD3	179.689	1.40115	up	0.00382099
TXNDC17	739.088	1.40071	up	4.14014e-05
AK6	960.902	1.40068	up	3.29389e-06
TMA16	584.304	1.39996	up	3.00584e-05
MPDU1	1400.93	1.39948	up	7.0872e-05
GPATCH4	1518.27	1.3981	up	0.000993645
LSM2	564.25	1.39692	up	4.87999e-05
SNRPC	2169.27	1.39541	up	7.35714e-05
PAK1IP1	1081.52	1.39535	up	7.90111e-05
GEMIN2	309.096	1.39521	up	1.65706e-05
LDHB	15443.1	1.3951	up	3.71177e-08
EIF2S2	5010.09	1.39444	up	1.21474e-05
COQ2	219.559	1.39423	up	3.17365e-05
ACYP1	265.566	1.39401	up	3.76768e-06
SEC11C	2329.43	1.39204	up	9.46778e-05
DKC1	2860.22	1.39122	up	7.51901e-05
SCCPDH	1230.67	1.39056	up	0.0007547
VDAC3	3097.09	1.39053	up	5.11118e-06
PNO1	953.284	1.39012	up	8.659e-05
NOL11	2750.79	1.39007	up	1.39905e-08
MRPL52	1020.02	1.38956	up	0.000250697
CHCHD1	862.558	1.38884	up	3.67748e-05
LOC100996747	118.197	1.38841	up	0.000613374
UTP14A	1343.41	1.3865	up	6.35051e-06
PRIM2	461.918	1.38592	up	4.03151e-06
ELOVL6	139.202	1.3859	up	0.010301
SSBP1	2596.4	1.38448	up	1.56365e-05
ADSL	2127.48	1.38423	up	1.0488e-06
GNL2	2185.88	1.38403	up	2.18924e-06
SNORA61	44.3348	1.38257	up	0.00322857
CMC2	771.858	1.38229	up	1.65428e-05
SNRNP25	460.187	1.38194	up	7.07737e-05
HOPX	4130.6	1.37993	up	3.91685e-06
TRIAP1	1108.01	1.37955	up	0.00264714
TIMM8A	242.847	1.37912	up	5.71428e-05
B4GALT2	111.858	1.37869	up	0.0484744
PTRH2	677.706	1.3765	up	6.56156e-06
INTS13	1216.05	1.37575	up	7.5225e-07
HMBS	436.828	1.37557	up	0.000422128
RARS1	2617.54	1.37544	up	5.08772e-06
MCM2	497.556	1.37439	up	0.0343667
GNPNAT1	615.867	1.37361	up	1.55465e-06
UTP15	885.281	1.37257	up	2.40803e-06
SNORD50B	24.8028	1.37179	up	0.0457891
CETN3	490.361	1.3713	up	2.39613e-06
PSMB7	2304.86	1.36884	up	1.94699e-05
OTUD6B	509.086	1.36876	up	5.67575e-08
RIDA	261.766	1.36816	up	0.000188332
RGS16	2018.33	1.36604	up	0.00607786
MANF	1241.06	1.36502	up	0.000155184
PFDN4	653.135	1.36178	up	4.22e-05
FANCB	165.202	1.36159	up	2.23316e-05
RAB38	113.461	1.36113	up	0.0207338
MSH2	1381.29	1.36066	up	2.42672e-08
CDCA7L	419.421	1.36018	up	3.2471e-08
RPL39L	118.613	1.35877	up	2.40743e-05
PSMB2	3966.95	1.35857	up	3.00936e-06
SNHG1	2727.56	1.35798	up	2.41389e-07
MAK16	1104.85	1.35752	up	5.65287e-09
SERBP1	8681.08	1.35678	up	5.12778e-06
MMS22L	330.739	1.35677	up	7.43437e-07
TIMM8B	832.834	1.35511	up	0.000152337
GSTO1	1978.56	1.35494	up	5.83917e-05
ZNRD2	613.873	1.35414	up	0.000360897
SNORA24	31.4944	1.35369	up	0.0168942
DDX21	7696.14	1.35317	up	6.24534e-05
GON7	472.971	1.35268	up	3.69422e-06
MRPL37	1265.55	1.35264	up	0.00201689
BOLA2	492.203	1.3523	up	0.000583225
OXCT1	1618.73	1.35194	up	2.98665e-09
CHCHD2	5847.38	1.35179	up	0.000173268
PRMT5-AS1	206.86	1.35147	up	0.00481982
SF3B6	2442.19	1.35147	up	3.53475e-05
MRPL58	776.351	1.35	up	9.31416e-06
DNAH11	79.6034	1.34994	up	0.000963294
PSMA3	4022.84	1.34985	up	1.05792e-06
MRPL22	912.325	1.3495	up	3.14968e-05
RFC2	600.891	1.3479	up	0.000717118
SLBP	1920.01	1.34692	up	2.98153e-06
NXT1	543.744	1.34652	up	1.89122e-05
LYPLA1	1500.92	1.34583	up	2.27208e-10
UMPS	1073.5	1.34554	up	2.60269e-05
CCDC73	488.291	1.34553	up	2.14537e-05
MRPS28	620.444	1.34541	up	2.42389e-06
NDUFV2	4221.93	1.34439	up	4.24653e-05
RABGGTB	2666.53	1.34421	up	4.80752e-05
ITGA2	36.0351	1.34273	up	0.0458124
RAD18	994.524	1.34198	up	7.75607e-07
GCSH	197.823	1.34153	up	0.00499847
UTP4	1533.84	1.34052	up	4.20734e-05
COPS3	2092.8	1.34028	up	0.000113526
TFDP1	767.558	1.33923	up	0.00159102
UPP1	1073.37	1.33898	up	0.0173196
GARS1	4376.69	1.33853	up	0.00062545
SMN2	985.604	1.33662	up	4.5723e-05
CYB5A	712.205	1.33591	up	5.5389e-07
PSMA1	5745.37	1.33546	up	2.74071e-05
LOC102724850	390.649	1.33448	up	0.00668626
IMPDH2	5003.03	1.33411	up	2.28808e-05
CCT4	6615.3	1.33411	up	0.000102323
NIFK-AS1	492.493	1.33324	up	2.3273e-07
AFMID	125.219	1.33303	up	0.00279854
NDC1	1187.66	1.33298	up	5.53613e-08
SAP30	224.967	1.33143	up	0.00288618
CDC123	2495.92	1.33086	up	1.26737e-05
SNORD14D	28.9138	1.33069	up	0.0200679
ILF2	5706.27	1.33007	up	2.89853e-05
ATAD5	387.734	1.32996	up	9.44124e-07
MACROD1	92.0317	1.32978	up	0.000614296
DPP4	1622.17	1.32938	up	0.000832941
TMEM200A	40.3995	1.32854	up	0.0218687
ATP5MD	1847.48	1.32843	up	6.66901e-05
PHOSPHO2-KLHL23	69.7845	1.32818	up	0.00366779
TDG	1769.27	1.32785	up	9.53109e-08
SUV39H2	356.065	1.32783	up	0.000387659
NDUFAF8	550.049	1.32775	up	0.00122822
CTSC	3200.46	1.32704	up	2.42999e-07
DCLRE1B	304.896	1.32703	up	0.000320183
GBP6	31.6709	1.32603	up	0.0385454
CCDC51	216.662	1.32573	up	0.00321761
NHP2	1483.37	1.32441	up	0.000215575
HDGFL3	1377.08	1.32432	up	0.0181141
PNPT1	1298.22	1.32381	up	5.89808e-07
PSMC3	2933.03	1.32228	up	0.000323424
C1orf112	507.208	1.32068	up	1.13999e-06
COX6A1	3378.33	1.31992	up	2.66638e-05
FAM86C1	47.0567	1.31985	up	0.0197638
CENPS-CORT	92.3328	1.31685	up	0.00685858
JPT1	882.496	1.31636	up	0.000503812
LSM4	1818.04	1.31442	up	0.000814029
SDHAF3	315.04	1.31439	up	1.50395e-06
DANCR	1126.07	1.31299	up	2.63313e-06
SRPRB	1725.83	1.31262	up	1.72375e-05
TXNDC5	822.712	1.31243	up	0.000136225
MSH6	1613.72	1.31176	up	5.63195e-05
MCM3	1821.62	1.31115	up	0.000380672
EFCAB11	109.672	1.3098	up	0.00208009
RIOX2	823.941	1.30969	up	1.02205e-06
MRPL20	1626.55	1.30895	up	1.00121e-05
ELOC	1299.71	1.30731	up	2.42389e-06
POLD3	642.628	1.30718	up	2.2985e-07
SIVA1	708.907	1.30616	up	8.96312e-06
YEATS4	738.021	1.30614	up	9.02295e-06
NDUFB3	1315.47	1.30476	up	1.99185e-05
RSL24D1	5844.71	1.30474	up	9.79722e-07
BOLA2-SMG1P6	721.613	1.30446	up	0.000126589
ACAT2	1344.66	1.3039	up	8.09982e-08
TWISTNB	1217.13	1.30214	up	9.79722e-07
NDUFA12	1324.18	1.3018	up	0.00017718
THUMPD2	343.825	1.30123	up	3.08601e-07
HAT1	2446.46	1.29814	up	8.69442e-07
VPS25	1137.97	1.2981	up	3.16183e-05
NAA20	1515.65	1.29786	up	4.1508e-05
PRMT5	1009.27	1.29708	up	0.00103573
NDUFB6	959.049	1.29666	up	9.81677e-05
DONSON	356.651	1.29481	up	0.000677987
SEM1	1475.44	1.29439	up	8.61719e-05
RCN1	687.068	1.29408	up	0.00423485
C12orf60	74.5016	1.29398	up	0.00133753
GLO1	3632.8	1.29371	up	5.69864e-08
TPM4	1784.34	1.29357	up	5.91991e-05
TSEN2	265.695	1.29229	up	3.01429e-05
PRKCQ-AS1	848.393	1.2921	up	9.18696e-07
TFB2M	809.266	1.29195	up	1.48375e-05
RUNX2-AS1	64.4434	1.29117	up	0.021162
TMEM126A	986.718	1.29057	up	0.00035819
RBX1	1631.3	1.29033	up	7.01354e-06
HSPB11	936.339	1.28817	up	0.000210789
IKBIP	549.053	1.28802	up	0.000128984
LOC102724951	85.952	1.28696	up	0.0307111
ZGRF1	409.615	1.28621	up	1.35593e-06
COPZ2	29.8297	1.28555	up	0.0375887
CXADR	324.705	1.28541	up	5.49405e-05
GTF2F2	937.135	1.28456	up	2.85895e-06
NAA38	678	1.28341	up	0.000465119
ATIC	2589.33	1.28204	up	1.48913e-06
HADH	579.536	1.28192	up	2.48728e-06
CKLF-CMTM1	442.714	1.28148	up	0.000244651
MRPL57	1109.53	1.28126	up	1.26767e-05
SNRPA1	1433.91	1.28101	up	4.06526e-06
ABCE1	4960.52	1.27736	up	1.66293e-07
GTF2H2C	487.341	1.27709	up	0.000147752
MYCBP	593.837	1.27685	up	1.65792e-05
PSMA6	5383.34	1.27669	up	7.03469e-05
CDK4	1563.56	1.27623	up	0.00567708
BLVRA	553.049	1.27571	up	2.23287e-06
PFDN6	1248.97	1.27542	up	0.000213083
CCDC138	179.951	1.27478	up	1.26767e-05
PSMA2	4964.97	1.27465	up	3.0125e-05
MRPL39	1021.25	1.27445	up	9.77247e-07
SAAL1	534.487	1.27333	up	0.000752006
TARS1	5439.73	1.27312	up	7.15889e-05
BLOC1S5-TXNDC5	841.949	1.27286	up	0.000146623
MRPL32	1069.6	1.27229	up	3.44754e-06
PUS7	423.328	1.27058	up	0.000677696
PRMT1	2635.24	1.27007	up	0.00408059
GAPDH	50424.5	1.26975	up	0.00138646
IPO11	507.758	1.26908	up	1.50395e-06
LSM7	1242.45	1.26896	up	0.000109481
ERH	3061.21	1.2687	up	9.46278e-06
PSMA4	4634.29	1.26771	up	2.23287e-06
NOLC1	4190.45	1.26669	up	0.000271261
LMO4	652.382	1.26652	up	0.000462872
GJA9-MYCBP	596.116	1.26645	up	1.48696e-05
TNFAIP8L2-SCNM1	511.937	1.26587	up	0.000105724
TOMM6	2987.16	1.26504	up	1.26767e-05
FCER2	63.7225	1.26497	up	0.00543685
POLR2K	2464.93	1.26486	up	4.02198e-05
EIF4E	1314.42	1.26396	up	3.83913e-09
NOC3L	1113.35	1.26231	up	9.9561e-08
TUBG1	314.585	1.2622	up	0.0255849
BCCIP	2171.72	1.26218	up	3.23976e-05
HPF1	507.547	1.26217	up	1.64839e-05
NLN	250.681	1.26127	up	0.00121252
NCL	17463.2	1.26105	up	5.71842e-05
COX7B	2311.42	1.26001	up	9.46778e-05
C11orf98	697.414	1.25961	up	0.000689338
CALM2	9185.88	1.25902	up	2.20789e-07
U2AF1	1220.07	1.25891	up	1.57858e-06
MRPL48	898.304	1.25648	up	1.978e-06
UBE2N	3657.51	1.25508	up	4.14046e-07
SNU13	2697.49	1.25308	up	1.65624e-06
ZFAS1	3635.3	1.25244	up	1.2514e-05
PSMA5	4245.27	1.25216	up	3.32811e-06
SUCLA2	812.797	1.24979	up	3.00936e-06
TMEM99	292.479	1.24927	up	0.00411112
UCHL5	1397.08	1.24868	up	3.18702e-07
EIF3M	5380.78	1.24819	up	2.63072e-07
PA2G4P4	76.9579	1.24792	up	0.00347293
ETFA	2309.09	1.2478	up	1.46505e-06
AK2	3197.93	1.24744	up	1.62215e-05
ANKRD39	168.055	1.24722	up	0.000324563
MRPS35	1630.98	1.24719	up	3.38705e-06
GTF3C6	1304.7	1.24717	up	2.18736e-05
MTAP	428.913	1.24663	up	1.26737e-05
DBI	3145.39	1.2453	up	2.01715e-05
SMN1	1603.93	1.24529	up	1.44722e-06
TRAPPC4	1586.13	1.24521	up	0.00529464
NCAPD3	923.049	1.2449	up	1.64744e-05
MMAB	364.693	1.24469	up	2.89853e-05
GLMN	582.308	1.24417	up	4.28726e-05
HNRNPAB	1585.4	1.24392	up	0.0194939
SLC27A5	73.7403	1.2438	up	0.00584129
GSTP1	4652.74	1.24313	up	0.000657986
DYRK4	351.023	1.24059	up	2.44108e-05
SCNM1	528.785	1.24036	up	0.000109481
LIX1L-AS1	307.556	1.24002	up	0.00101503
NDUFS4	651.861	1.23937	up	3.1056e-07
BUD31	1382.92	1.23914	up	7.26797e-05
ESF1	808.173	1.2387	up	9.77247e-07
ANAPC11	788.034	1.23857	up	0.000200151
NDUFA6	2035.43	1.23852	up	0.0017234
CCT7	5904.22	1.2379	up	0.00102737
CKLF	506.901	1.2378	up	0.000512722
CCT3	6763.9	1.23683	up	0.000107803
DDX39A	3057.78	1.23575	up	0.000296463
MICOS13	840.919	1.23568	up	0.000139668
LOC105373335	24.5143	1.23489	up	0.0438334
PCBD1	216.68	1.23473	up	0.00286698
MAGOH	1388.41	1.23444	up	3.17365e-05
LOC102724219	53.3653	1.23327	up	0.0463874
ODC1	4319.54	1.23311	up	0.000849288
PEX2	1667.39	1.23236	up	7.08178e-05
RIOK1	1107.64	1.2318	up	0.000204858
SNRPD2	3995.27	1.23179	up	9.57566e-05
EIF2B2	690.317	1.23137	up	4.57308e-06
LARP4	1455.47	1.23112	up	4.1508e-05
WDR43	2659.84	1.23111	up	4.77851e-06
LRP11	41.3655	1.22989	up	0.0152935
POLR2L	1212.14	1.22977	up	0.000373501
SPTSSA	365.931	1.22913	up	6.55353e-07
LOC107985034	211.532	1.22889	up	0.00187499
SLC1A5	1107.88	1.22851	up	0.0400966
TOE1	409.984	1.22748	up	0.00028456
DNAJA1	8486.96	1.22737	up	1.65428e-05
ACSM3	128.379	1.22629	up	5.6063e-05
IL23A	261.423	1.22625	up	5.5828e-06
PRMT3	819.21	1.22595	up	1.04051e-05
ZNF726	100.144	1.22498	up	0.00501285
TTC26	137.213	1.22392	up	0.00641175
CCDC6	1633.38	1.22273	up	0.00372566
RRP15	816.978	1.22268	up	8.69442e-07
DCLRE1A	747.98	1.22256	up	1.61774e-06
SF3B5	2654.32	1.22234	up	8.1907e-05
RPP30	1065.33	1.22231	up	0.000240134
ACAA2	1844.2	1.22049	up	0.000390528
HAUS1	832.307	1.22014	up	7.66795e-05
WDR3	1490.98	1.21913	up	1.61988e-05
UBE2V2	1692.93	1.21893	up	2.17275e-07
UQCRH	2897.02	1.21861	up	2.04325e-05
CHCHD3	1046.13	1.21792	up	3.47042e-05
MORN2	114.257	1.21716	up	0.00484655
CDK6	2319.28	1.21653	up	0.0372718
POLA1	634.12	1.21616	up	0.000200151
ATP5F1C	3637.1	1.21611	up	4.50114e-06
SDHB	1947.32	1.2161	up	3.02843e-05
KCNK5	129.482	1.21575	up	0.00460535
CIAO2B	1032.47	1.21417	up	2.52329e-05
BYSL	301.903	1.21406	up	0.043432
MRPL46	580.406	1.2139	up	5.60579e-05
GSTCD	187.568	1.21341	up	0.0107995
MIF	1182.23	1.21331	up	0.017533
NUDT15	428.259	1.21292	up	0.000529369
COX8A	2367.71	1.21276	up	1.12904e-05
CHORDC1	1912.2	1.21252	up	5.42935e-07
MRPS33	819.547	1.21206	up	3.65234e-05
THOC3	483.297	1.21137	up	0.0223369
SMIM30	854.635	1.21099	up	6.36846e-07
PSMC2	3219.94	1.21076	up	3.67748e-05
GTF2A2	1526.12	1.21068	up	3.29389e-06
METTL5	1157.48	1.20986	up	3.37083e-06
FADS2	51.8942	1.20976	up	0.0112065
NDUFA9	1798.22	1.2097	up	1.19332e-05
GET1	219.53	1.20898	up	4.36177e-06
PXMP2	78.8297	1.20883	up	0.00964844
PGAM4	166.026	1.20882	up	0.00478233
TIMM9	776.68	1.20862	up	0.000111952
P4HA2	71.3732	1.20778	up	0.0357421
ATP5MC1	1268.16	1.20725	up	0.000176179
EXOSC4	216.358	1.20719	up	0.0126324
ZNF267	2093.31	1.20623	up	2.95295e-09
ALG14	130.6	1.20605	up	0.00117413
MAMDC2	312.921	1.20569	up	0.000368986
GADD45GIP1	1185.48	1.20558	up	0.00269562
PSMD12	1941.8	1.20556	up	2.42389e-06
EEF1E1-BLOC1S5	664.063	1.20388	up	8.08129e-05
SNHG3	2107.59	1.20373	up	0.00620084
HIGD1A	2498.38	1.20314	up	6.30009e-07
ATP5MF	1440.07	1.20295	up	0.000669457
FKBP11	928.944	1.20275	up	0.000564799
PTGER2	508.484	1.20242	up	0.00479798
CD55	1198.76	1.20172	up	0.000617639
TNF	1403.47	1.19986	up	0.0127154
FSBP	36.0048	1.19952	up	0.0326339
NANP	127.669	1.19919	up	0.00232778
GLRX3	2053.09	1.19882	up	0.000385092
COA4	944.085	1.19845	up	8.72031e-05
NDUFS6	899.833	1.19835	up	0.00063636
NDUFS5	2207.33	1.19724	up	0.00789097
PPIH	1060.58	1.19612	up	2.55456e-06
SNAPC1	316.507	1.19589	up	0.000295659
SNHG8	1215.49	1.19541	up	2.2985e-07
HMGB1	12149.3	1.19522	up	3.23855e-09
ALG5	917.816	1.19307	up	0.000225133
EIF6	2533.41	1.19276	up	0.000139971
CENPJ	443.48	1.19237	up	2.19142e-07
MRPS9-AS1	139.658	1.19235	up	0.00129385
POP1	436.909	1.1915	up	0.00286154
UBE3D	119.044	1.19064	up	0.000288894
SEH1L	987.262	1.18828	up	0.000361394
TSR1	1393.17	1.18811	up	0.000679009
MTCH2	1623.67	1.18807	up	9.12263e-05
SNRPB2	2454.15	1.18702	up	2.13894e-05
PSMA7	5116.74	1.18672	up	8.62357e-05
NDUFB9	1859.77	1.18669	up	2.79537e-05
PGAM1	4461.08	1.18611	up	0.00469567
HSBP1	1241.28	1.18595	up	3.03395e-06
SPAG1	233.337	1.18568	up	0.000292099
TTI2	547.912	1.18429	up	9.58831e-06
PUDP	273.42	1.18423	up	0.000516499
ADK	830.433	1.18353	up	6.95859e-06
FANCC	145.816	1.1827	up	0.00274184
ST8SIA4	1166.14	1.18252	up	0.000262307
NUP107	2182.4	1.18251	up	2.17166e-06
HIKESHI	1160.72	1.18213	up	4.20734e-05
LOC102724701	71.106	1.18189	up	0.03634
PSMC6	2763.65	1.18138	up	2.23432e-06
MIF-AS1	1199.52	1.18134	up	0.0202342
NUTF2	1529.72	1.18113	up	0.000160602
SNORD36A	83.3046	1.18065	up	0.00399213
ATF4	9166.66	1.18041	up	0.00252799
NASP	2769.74	1.1793	up	1.64208e-05
GIHCG	174.281	1.17886	up	0.00162955
LRRC75A	1755.32	1.1785	up	0.00110055
MTPAP	732.718	1.17762	up	3.32951e-05
DLEU2	358.735	1.17714	up	1.75276e-06
ATP5ME	1182.07	1.17643	up	0.00025267
NAA15	2261.86	1.17585	up	9.69592e-05
COX7A2	2797.52	1.17561	up	0.000106874
NUDT6	45.492	1.17542	up	0.00811524
METAP2	3073.25	1.17511	up	3.37203e-06
NGDN	1352.41	1.17287	up	2.41562e-05
IER3IP1	1475.97	1.1727	up	4.70246e-07
TPRKB	647.821	1.17263	up	1.92629e-05
GTF2H2C_2	243.656	1.17188	up	0.019926
COPS9	740.372	1.17171	up	0.000146565
PSMD7	3442.03	1.17138	up	1.62408e-05
PTGES3L-AARSD1	252.446	1.17124	up	0.0013046
SUCLG1	1464.36	1.16989	up	6.19024e-06
CD320	301.998	1.16958	up	0.0281945
AARSD1	251.785	1.16924	up	0.00140886
COPRS	311.545	1.16828	up	0.00543685
DPM1	1399.99	1.16782	up	4.10558e-07
BARD1	296.838	1.16765	up	1.10224e-05
COA6	513.925	1.16733	up	0.000365421
ACTL6A	1581.07	1.16666	up	1.23792e-06
XRCC5	12465.6	1.16597	up	2.42389e-06
AICDA	106.833	1.16571	up	0.0424917
GATB	373.816	1.16557	up	0.000311838
EIF4A3	1835.13	1.16512	up	9.12723e-05
HYLS1	195.993	1.1643	up	9.78632e-05
RCC1	933.908	1.16328	up	0.0300966
PRELID1	1175.88	1.16284	up	0.00515971
SARNP	1519.76	1.16215	up	3.64428e-05
VDAC1	3790.35	1.16202	up	0.000150053
HAUS7	284.815	1.1618	up	0.000332681
EIF1AX	2502.62	1.16162	up	2.03258e-08
MLH1	1199.01	1.16147	up	3.12836e-06
MPV17L2	195.771	1.16082	up	0.0388167
LBHD1	755.098	1.16063	up	0.00140057
MAPKAPK3	752.551	1.16054	up	0.019371
LYRM4	524.373	1.16002	up	0.000155184
SOD1	4169.93	1.15974	up	2.93734e-06
HSPA14	1456.11	1.15935	up	5.27305e-05
SLC9B1	91.414	1.15855	up	0.00117885
PPA2	1036.91	1.15784	up	8.96606e-06
MYL6B	220.362	1.15784	up	0.0215027
MRPS36	763.656	1.15731	up	0.000262307
POLR1C	679.924	1.15722	up	0.000284511
TESC	159.321	1.15688	up	0.00253775
MRPS24	410.998	1.15684	up	0.000936575
PPCDC	214.098	1.15486	up	2.61976e-05
MRPL18	1150.24	1.15438	up	6.35331e-05
GTF2H5	487.491	1.15417	up	0.000493788
CCDC59	1139.54	1.15339	up	1.39577e-05
SNHG29	6023.96	1.1522	up	0.000464086
RPL23AP7	223.074	1.15193	up	0.00301833
TMEM11	414.497	1.15147	up	0.000504898
BATF	714.363	1.15088	up	0.000132317
IPO5	3260.59	1.15006	up	9.27941e-05
PTP4A3	127.481	1.14857	up	0.0193652
STIP1	3780.66	1.14828	up	0.0115969
SMC4	1697.56	1.1474	up	3.87456e-05
CFAP20	829.102	1.14617	up	1.65635e-05
FAM162A	888.275	1.1459	up	4.66373e-05
CINP	606.277	1.14555	up	0.000206399
SUMO2	3838.68	1.14522	up	5.42365e-06
RMI1	392.551	1.14502	up	5.37181e-05
SNHG4	143.884	1.14428	up	0.000477466
MDH1	3791.42	1.14344	up	5.89718e-06
MTX2	546.137	1.14295	up	0.000373501
RABEPK	413.607	1.14223	up	0.00449405
SMIM4	143.637	1.14222	up	0.000911533
ERI1	657.073	1.14174	up	0.000142959
LCLAT1	452.896	1.14069	up	0.000341057
HDAC2	2496.56	1.14047	up	0.00014221
NEK6	314.158	1.14022	up	0.000422337
WDR36	1602.55	1.13993	up	7.71991e-06
EXOSC1	959.476	1.1397	up	2.18246e-05
GART	2607.24	1.13962	up	6.34426e-05
PGRMC1	575.282	1.13893	up	0.000210789
OLA1	1848.16	1.13674	up	0.000683946
CDC7	786.691	1.13663	up	0.00154593
CISD2	639.169	1.13635	up	7.11631e-06
COPS5	1932.02	1.13621	up	1.17563e-05
CRLS1	862.375	1.13618	up	0.000152848
PSMB1	4091.67	1.13587	up	0.000160284
ATP5MPL	1639.5	1.13559	up	0.000108991
SLC39A4	93.917	1.13544	up	0.0132035
APTX	828.403	1.13447	up	0.000176912
BRCA2	305.868	1.13425	up	5.83917e-05
NDUFA4	3024.56	1.13377	up	7.62508e-05
FAR2	180.456	1.1329	up	4.34172e-05
VDAC2	2654.8	1.13288	up	3.28968e-05
LYRM1	843.23	1.13232	up	9.57559e-05
PSMB3	3329.96	1.13132	up	0.000568219
MIR1244-1	963.997	1.13093	up	4.93136e-07
LOC101927202	208.718	1.1306	up	0.0498703
TFAM	1890.03	1.13011	up	2.20789e-07
NOL10	1049.71	1.12998	up	0.000182692
PIF1	71.8718	1.12945	up	0.0196376
URGCP-MRPS24	418.219	1.12849	up	0.00111628
FKBP1B	186.511	1.12808	up	0.000995413
ATP5F1B	11177.6	1.12808	up	6.19247e-05
SRSF3	11214	1.12676	up	3.42522e-07
ELP6	573.979	1.1266	up	0.00172365
ATP5PF	1707.34	1.12619	up	0.000422128
TIMM13	492.099	1.12612	up	0.0251448
TNFSF8	1069.87	1.12592	up	0.011811
SRP9	5285.84	1.12573	up	2.01818e-08
MRPL42	1511.01	1.12532	up	1.13186e-06
APEX1	2807.66	1.12471	up	2.98584e-05
MRPS22	1064.67	1.12469	up	0.00028273
MRPL40	688.927	1.12375	up	0.00017718
NANS	393.75	1.12324	up	0.000297056
MRPS11	737.013	1.12276	up	0.00022145
RNF144A-AS1	52.0077	1.12241	up	0.0325617
EXOSC5	314.68	1.12146	up	0.00474635
IARS1	4219.63	1.12078	up	0.000163919
PI4K2B	902.109	1.1204	up	7.76524e-05
RDX	790.028	1.11967	up	9.26843e-07
AHCY	853.981	1.11941	up	0.00726779
SNRPD3	3155.92	1.11933	up	2.86275e-05
RGS1	1682.52	1.11796	up	0.00117413
DCUN1D5	976.222	1.1177	up	0.00225761
NOB1	1686.85	1.1175	up	0.000303485
PRDM1	594.06	1.11741	up	0.0177406
ERCC8	229.537	1.11704	up	8.61704e-05
WARS2	330.3	1.11616	up	0.000851304
LACTB2	295.719	1.11608	up	6.49668e-06
TADA2A	603.928	1.11577	up	0.00208009
NUP155	1298.72	1.11477	up	2.11128e-06
NDUFB8	2129.16	1.11452	up	0.000190669
TGDS	622.484	1.11391	up	3.03395e-06
HBS1L	1736.01	1.11345	up	0.00015092
ZC3H15	3079.16	1.11334	up	1.45055e-06
MRPL19	937.031	1.11317	up	0.000400895
METTL2A	440.242	1.11313	up	0.00882662
NMD3	1681.53	1.11236	up	2.63072e-07
SLC4A5	145.554	1.11235	up	0.00283845
TOMM22	1530.77	1.11229	up	0.00149292
CCDC77	297.983	1.11227	up	0.00499442
GOT1	547.35	1.11114	up	0.000120734
UQCRHL	134.177	1.11096	up	0.00762268
RPS24	21836.7	1.11094	up	9.73983e-05
VBP1	1794.15	1.11012	up	0.00015824
TEFM	313.653	1.10986	up	0.00060511
HSD17B10	1079.62	1.10961	up	0.000710994
NKG7	8681	1.10923	up	0.0206037
ATP5MF-PTCD1	944.982	1.10896	up	0.00127499
NDUFB2	1181.93	1.1084	up	0.000583225
KATNBL1P6	49.4626	1.10785	up	0.0192342
FAS	2306.76	1.10759	up	4.5257e-05
IER3	464.577	1.10747	up	0.0409636
NUDT5	2090.99	1.10679	up	8.02941e-05
ERGIC2	1558.21	1.10545	up	1.33679e-05
GAS5	6086.42	1.10543	up	9.17992e-05
WDR34	142.513	1.10498	up	0.0247136
NCBP2-AS1	55.6089	1.10495	up	0.020025
NAE1	2227.12	1.1047	up	8.80559e-06
MRPS18C	625.826	1.10449	up	0.000112528
CENPL	221.82	1.1044	up	0.00151822
PGK1	8963.69	1.10431	up	2.10484e-07
PBDC1	943.328	1.1042	up	6.29939e-06
SFXN1	3318.14	1.10405	up	0.00358273
ZCCHC10	545.038	1.10393	up	2.23287e-06
OSTC	1864.5	1.10387	up	5.14187e-05
C1GALT1C1	662.239	1.10352	up	0.000541282
EXTL2	266.971	1.10327	up	0.00310651
POLR2I	473.347	1.1026	up	0.00627124
UTP6	1844.72	1.10239	up	1.38614e-06
MXD3	638.525	1.10162	up	0.00540796
ROMO1	674.388	1.10143	up	0.00116619
NSMCE1	1744.01	1.10117	up	0.000122668
SRI	1433.25	1.0996	up	8.96312e-06
POLR3F	445.22	1.09934	up	0.000153355
TAF1D	2775.62	1.09897	up	5.19245e-06
ECHDC1	1563.02	1.09722	up	9.4191e-06
HINT2	358.043	1.09704	up	0.00901936
LMAN1	3028.8	1.09642	up	2.40803e-06
NFE2L3	523.431	1.096	up	0.00680944
ELOB	2629.18	1.09586	up	0.00203723
KIF2A	2787.21	1.09523	up	5.41536e-06
RBIS	1261.7	1.09462	up	0.000678341
TIMM50	899.204	1.09443	up	0.00566538
COX6C	2449.61	1.0942	up	0.000254569
PRELID3B	1995.69	1.09399	up	1.02282e-07
POGLUT3	265.882	1.09299	up	0.00151834
COPS2	2475.56	1.09266	up	1.06069e-07
PSMD6	2818.87	1.09213	up	4.12652e-05
UQCR10	1180.15	1.09208	up	0.000124138
NABP2	546.598	1.09203	up	0.0237414
NUP93	1271.81	1.0918	up	6.86727e-05
CENPP	203.807	1.09033	up	0.0017461
ALG8	840.9	1.0899	up	1.60372e-05
LOC101928000	107.859	1.0897	up	0.0297364
APIP	644.314	1.08959	up	7.90624e-05
PTGIR	340.979	1.08921	up	0.0133769
FRMD7	244.805	1.08915	up	0.00673952
HCST	1449	1.08895	up	3.89282e-05
MRPL33	789.185	1.08854	up	0.000153355
TIMM17B	630.34	1.0883	up	0.000921527
NDUFC2-KCTD14	644.67	1.08809	up	0.000381115
LOC100294145	578.884	1.08623	up	0.000179058
MTFP1	520.991	1.08598	up	0.0116298
XRCC4	293.492	1.0859	up	5.045e-05
NDUFA8	624.29	1.08555	up	0.000107521
BRI3BP	309.166	1.0855	up	0.0298978
PLS1	152.073	1.0849	up	0.000581205
MCM8	832.41	1.08468	up	0.000410592
CGAS	335.115	1.08367	up	0.0145544
LOC100129034	787.822	1.08337	up	0.000384054
CDK2	784.268	1.08321	up	0.00268726
ACSBG1	367.554	1.08317	up	4.37146e-05
COMMD1	955.518	1.08292	up	0.000281219
LSM6	700.264	1.08215	up	0.000253575
ANKRD46	359.952	1.08118	up	2.93734e-06
POLR2G	1473.99	1.08095	up	8.23479e-05
CPSF3	1365.03	1.08087	up	7.51401e-05
HSP90AB1	36311.9	1.08073	up	0.00119377
RRP7A	974.373	1.08025	up	0.0102544
MFSD2A	177.887	1.07983	up	0.0122297
AGMAT	210.455	1.07982	up	0.0310925
MAL	200.137	1.07961	up	0.00963124
DPY30	799.576	1.07925	up	0.000259668
TATDN1	977.631	1.07921	up	1.2514e-05
C16orf87	303.316	1.07903	up	0.000118028
DAD1	3258.2	1.07893	up	0.00123178
SYNCRIP	5223.62	1.07843	up	8.3425e-06
GNGT2	167.16	1.07826	up	0.00140886
LOC105369332	104.584	1.07803	up	0.0297823
NDUFB4	1956.33	1.078	up	6.12297e-05
AMD1	2259.83	1.07752	up	2.36365e-07
DDX47	2245.21	1.0775	up	2.14537e-05
UBE2L3	3248.08	1.07654	up	0.000407736
CSTF2	644.264	1.07628	up	0.00157315
FAM98A	654.637	1.07566	up	0.00291231
MORF4L2	2324.24	1.07554	up	4.10558e-07
C1orf131	469.071	1.07483	up	4.17112e-06
PSMB4	5159.52	1.07386	up	8.87117e-05
RPL35	15002.2	1.07342	up	0.000472601
C12orf45	333.291	1.0733	up	0.000516959
ZNF330	920.768	1.07283	up	5.67434e-07
AIMP1	2004.23	1.07218	up	1.14833e-06
SNHG19	130.58	1.07213	up	0.0249798
EMG1	1635.99	1.07154	up	0.000255216
FARS2	311.804	1.07136	up	0.0008391
NDUFB1	728.474	1.07095	up	0.000747782
FASTKD2	1289.6	1.07045	up	1.12852e-05
MCTS1	1553.99	1.07038	up	9.95315e-05
DHX15	4223.4	1.06958	up	1.77864e-05
PCGF6	255.924	1.06832	up	0.00206217
DYNLT1	734.474	1.06824	up	0.000888921
RTRAF	3292.59	1.06762	up	3.28968e-05
ALDH18A1	902.156	1.06741	up	0.000220205
TPMT	507.254	1.06674	up	2.53237e-05
LINC01215	873.828	1.06662	up	6.89869e-05
MMADHC	2469.56	1.06636	up	0.000157987
LOC102723885	97.9626	1.06596	up	0.00450298
KARS1	5401.31	1.06524	up	6.95179e-06
PSMC1	707.814	1.0646	up	0.00217495
TLCD1	286.747	1.06438	up	0.00424677
POP7	298.3	1.06408	up	0.0188181
GOT2	1253.56	1.06406	up	0.00532585
SRPK1	2416.5	1.06341	up	2.14537e-05
LOC105379382	76.561	1.06339	up	0.0188324
HDDC2	930.446	1.06293	up	0.000236045
DTD1	647.99	1.06241	up	0.00184414
LACTB2-AS1	62.8083	1.06238	up	0.00965095
LRPPRC	3899.95	1.06226	up	7.03056e-06
RCL1	358.126	1.06219	up	0.000835612
DLD	2247.05	1.05994	up	1.0953e-06
TXNDC9	1078.32	1.05843	up	8.06111e-06
LAMTOR5	1320.43	1.0579	up	5.00174e-05
SRD5A3	208.277	1.05774	up	0.00556731
MRM3	336.199	1.05734	up	0.00079246
ORC5	689.42	1.05687	up	8.3546e-05
MRPL45	1099.96	1.05685	up	0.000882542
LTV1	1491.41	1.05684	up	3.37508e-05
EMP3	3158.48	1.05626	up	0.00169494
KBTBD8	533.419	1.05606	up	0.000182568
FBXO22	744.173	1.05602	up	0.000130566
TBC1D7	97.5878	1.05502	up	0.00801906
FRG1	1201.65	1.055	up	1.3135e-05
POLR2F	564.237	1.05493	up	0.00107383
SEC61B	3385.89	1.05473	up	0.00187548
POLR1B	1104.78	1.05441	up	0.000779391
CSNK2B	1016.24	1.05375	up	2.94457e-05
FDPS	1649.97	1.0535	up	3.02445e-05
RPL24	15863.8	1.0534	up	0.000113367
HAUS8	302.167	1.05334	up	0.000618112
NIP7	1050.19	1.05327	up	0.00283822
TYW3	1105.69	1.05284	up	5.43569e-06
CHEK2	146.148	1.05275	up	0.00146483
NDUFB2-AS1	206.426	1.05255	up	0.00153711
IDH3A	899.536	1.05172	up	2.47194e-05
SNORD76	55.7794	1.05153	up	0.0143445
TMEM258	1228.82	1.0512	up	0.000121137
C19orf53	1716.28	1.05113	up	0.0015105
MRPS26	428.292	1.05096	up	0.00309244
ABHD10	831.774	1.05094	up	5.19245e-06
PSMD1	3225.04	1.0506	up	0.000605573
FIGNL1	828.21	1.05041	up	1.12544e-05
MRPS18B	778.642	1.04939	up	0.00876634
EIF3J	1964.67	1.0488	up	0.0016391
HNRNPF	6998.26	1.04868	up	1.37582e-05
SYTL3	800.421	1.04726	up	0.00305072
SNX22	2108.06	1.0469	up	2.30732e-05
ATP5PB	4661.49	1.04654	up	4.20155e-05
DNTTIP2	3638.05	1.04637	up	5.41536e-06
LOC107987209	217.89	1.04636	up	0.0013304
RRAS2	1038.62	1.04613	up	0.017158
PWP1	2174.58	1.04604	up	3.28968e-05
CBWD1	912.588	1.04593	up	0.000149979
COA3	737.243	1.0455	up	0.000511101
LRRC40	756.208	1.04473	up	1.48807e-06
RPSAP58	18268.1	1.04465	up	0.00116294
DYRK3	134.442	1.04425	up	0.00653533
ANAPC10	507.505	1.0442	up	1.06619e-05
JPT2	710.913	1.04395	up	0.000961903
RPP21	61.155	1.04395	up	0.0355702
CCDC152	221.811	1.0439	up	0.0368396
PPIB	3659.2	1.04338	up	1.72207e-05
TMA7	3236.77	1.04277	up	0.000514514
CD69	3976.13	1.04215	up	1.8036e-06
GPX7	378.812	1.04128	up	0.00189325
EXOSC2	849.68	1.04114	up	0.00374101
DDX1	2689.16	1.04099	up	0.000104491
PSME2	4653.8	1.04095	up	2.14861e-05
HAUS2	773.707	1.0399	up	0.00226236
MAT2A	3754.6	1.03971	up	3.49317e-05
FAM104B	190.341	1.03963	up	0.000660061
SLC35G1	108.204	1.03878	up	0.00166347
MIR1244-2	643.645	1.03873	up	9.81526e-06
MANEA	532.596	1.03848	up	0.000202894
RSPH9	176.785	1.03821	up	0.00209744
IMMP1L	199.222	1.03783	up	0.00181206
SMIM15	925.529	1.03767	up	3.83044e-07
MDH2	1892.27	1.03748	up	0.00229042
HNRNPC	16589.5	1.03746	up	3.76768e-06
KIF9	54.8045	1.03742	up	0.0171257
SNRPB	2868.9	1.03658	up	0.0308902
RIOK2	1003.31	1.03544	up	3.3164e-06
TAGLN2	5501.75	1.03503	up	0.000857392
L2HGDH	221.534	1.0341	up	0.0247728
FAM98B	944.241	1.03386	up	0.000360897
SNHG16	1636.93	1.03333	up	0.00121341
SNORA6	60.8142	1.03323	up	0.0453394
ATP5PD	1774.68	1.03302	up	9.8998e-05
MRPL50	1235.32	1.03286	up	1.3137e-06
SLC25A17	747.403	1.03284	up	4.37146e-05
MFAP1	1122.6	1.03265	up	2.10366e-05
SF3A3	2877.21	1.03191	up	0.000213513
MRPS31	895.023	1.03148	up	2.41562e-05
NDUFS3	1110.84	1.03116	up	0.00120623
FASTKD1	888.245	1.03019	up	1.22231e-05
CCNB1IP1	929.153	1.0292	up	0.00103763
ETF1	2991.21	1.02909	up	0.00628249
SRSF7	5930.67	1.0286	up	3.20324e-08
MRPL16	806.295	1.02845	up	0.00169309
GLB1L3	47.3365	1.02819	up	0.0412345
C12orf29	784.154	1.02814	up	1.5974e-05
RBM8A	2871.04	1.02803	up	0.000267811
HSPA9	7358.25	1.028	up	2.18463e-05
NDUFA13	2307.58	1.02787	up	0.000791261
IL32	8502.1	1.02742	up	0.000451415
SAE1	1152.69	1.0261	up	0.00291927
CFLAR-AS1	222.849	1.02501	up	0.00429335
MROH7-TTC4	449.529	1.02492	up	0.0037578
LOC102724843	123.84	1.02462	up	0.0426102
C8orf76	243.829	1.0242	up	0.00684159
CEP41	228.964	1.02378	up	0.00135877
TMEM267	502.469	1.0236	up	6.76117e-05
BOLA1	286.648	1.02346	up	0.00218936
FAM149B1	859.032	1.02335	up	0.000139331
RPF1	2146.4	1.02277	up	9.45379e-05
PDCD10	1865.18	1.02222	up	4.38408e-05
CENPV	96.4666	1.02217	up	0.0390651
TTC4	465.835	1.02215	up	0.00358516
PSMB6	1679.23	1.02157	up	0.00555478
GMPS	1580.46	1.02053	up	0.00438073
RPL7L1	2850.46	1.02026	up	0.00663646
TBCA	1776.83	1.02006	up	0.000104659
NUDC	1351.26	1.01932	up	0.00929286
RWDD4	500.394	1.01928	up	0.000449019
EIF5AL1	454.563	1.01903	up	0.0215754
UQCRFS1	2102.23	1.01893	up	0.00111133
RBFA	313.131	1.01779	up	0.000361394
TCTEX1D2	91.4394	1.01697	up	0.00607634
TMX2	1338.65	1.01675	up	7.40152e-05
CIT	43.9948	1.01669	up	0.0329756
ELP4	426.997	1.01563	up	2.45446e-05
IFT46	452.569	1.0155	up	0.00806943
SFT2D1	601.918	1.01527	up	0.000485579
BTBD10	531.497	1.01516	up	1.36352e-05
CLIC1	2893.18	1.0148	up	0.00126219
BDH1	296.462	1.01404	up	0.00477365
NDUFB7	1171.03	1.0138	up	0.00274582
MTIF2	1533.45	1.01342	up	4.48499e-05
EIF2A	3555.89	1.01325	up	2.48728e-06
CENPO	293.218	1.01324	up	0.00907136
MLX	787.133	1.01309	up	0.000208542
COX16	606.065	1.01294	up	0.00213422
FANCG	248.153	1.01282	up	0.00231142
NDUFA2	803.27	1.01279	up	0.000651207
SLC17A9	106.343	1.0124	up	0.0285899
SNX5	2260.08	1.01215	up	4.90147e-05
HAUS4	449.802	1.01214	up	2.40036e-05
ACOT4	100.85	1.01209	up	0.0188146
TXN2	1178.16	1.01152	up	0.000268476
KATNBL1	675.843	1.01152	up	4.37146e-05
HINT1	6107.79	1.01142	up	0.000155569
RAD51B	149.629	1.01064	up	0.000469397
RP9	305.136	1.01032	up	0.00769504
MALSU1	477.409	1.01005	up	0.00116093
C12orf4	585.016	1.0095	up	1.26737e-05
NDUFB5	1618.54	1.00936	up	5.99503e-05
HAX1	1581.04	1.00808	up	0.000263416
TIMMDC1	1322.6	1.0078	up	0.000172708
PSMG2	1558.99	1.00756	up	1.94699e-05
HACD3	1496.42	1.00702	up	0.000299684
IDI1	2567.01	1.00677	up	1.73582e-06
SUPV3L1	770.89	1.00633	up	0.000177409
UBXN8	244.862	1.00605	up	0.0013573
HDDC3	323.339	1.00593	up	0.0109556
CORO1A	7948.7	1.00579	up	1.59816e-05
SHMT2	2620.22	1.00572	up	0.0360681
MASTL	500.949	1.00516	up	0.000568788
CYB5B	2118.57	1.0051	up	0.000119384
TTC27	714.384	1.00504	up	0.00106296
SNORA33	84.5148	1.00491	up	0.0270871
NSMCE2	625.215	1.00386	up	9.0772e-05
CLP1	412.434	1.00283	up	0.00352431
SNX4	1000.67	1.00277	up	2.16889e-06
SYNJ2BP-COX16	532.085	1.00256	up	0.00181206
GNG5	1794.85	1.00233	up	0.000714576
U2AF1L5	1236.26	1.00216	up	0.00499304
GPR65	1290.91	1.00181	up	0.000146565
COX6B1	2748.87	1.0018	up	0.000772167
RAD50	1576.48	1.00179	up	9.13474e-05
C12orf75	878.697	1.0016	up	9.75955e-05
SNRNP40	1302.45	1.00094	up	7.42889e-05
NDUFC2	927.961	1.00086	up	0.000679009
NUDT2	395.559	1.0007	up	0.00103722
RPS19BP1	1426.57	1.00016	up	0.00538768
LOC112694756	2954.52	0.999869	up	0.0299324
RNF125	1062.43	0.998854	up	0.00502447
RPA2	2838.97	0.998459	up	0.000119741
MICOS10	893.655	0.998259	up	0.00735601
MRPS16	1613.39	0.998243	up	0.00114435
THNSL1	181.766	0.998061	up	0.00206359
CDK7	984.251	0.997827	up	0.00119561
BRMS1L	171.011	0.997729	up	0.000360897
MGME1	518.673	0.997664	up	0.00345555
LINC01934	82.814	0.997568	up	0.00732327
DYNLL1	2644.29	0.997539	up	0.0011822
DUSP12	677.486	0.997475	up	7.01354e-06
UTP18	1457.72	0.997189	up	0.000948135
PHTF2	786.967	0.996659	up	0.00214648
FANCL	397.06	0.996626	up	5.58663e-05
MRPL54	693.764	0.996483	up	6.67993e-05
NUP54	1235.31	0.996096	up	2.58362e-05
DCXR	332.232	0.994512	up	0.00288251
CD83	4684.22	0.994181	up	6.08179e-06
TRMT5	382.886	0.993973	up	0.0011767
MRPS34	760.106	0.993784	up	0.0224524
DSN1	432.021	0.993386	up	0.0132279
EI24	1080.34	0.993256	up	0.00180501
TUBE1	552.887	0.992596	up	0.00103252
PRPS1	1601.74	0.992499	up	1.39577e-05
ALG3	451.446	0.992317	up	0.00320679
CNIH4	650.508	0.992291	up	0.00342266
MTERF3	490.053	0.992268	up	0.00441082
SMCO4	48.3803	0.991842	up	0.0484641
EIF5A	4936.83	0.991387	up	0.0196926
SETMAR	386.292	0.990436	up	0.00154315
ENY2	1319.44	0.989726	up	0.00033936
SLC25A33	374.524	0.989675	up	0.00891969
PIH1D2	134.127	0.989223	up	0.00173104
MRPS7	1493.32	0.988606	up	0.00553889
MRPS18A	420.996	0.987393	up	0.000824636
MRPS21	1501.34	0.987291	up	0.000107063
SPCS1	2277.11	0.9863	up	3.14968e-05
NUDT21	3486.58	0.98578	up	1.08873e-07
HMGN5	74.3922	0.985734	up	0.0191376
MRPL14	566.266	0.985598	up	0.000673785
ZNHIT3	1213.72	0.98479	up	0.000702184
CHMP5	1306.36	0.984718	up	1.56365e-05
FADS1	111.918	0.983873	up	0.0133339
NDUFB11	1615.64	0.983834	up	0.00280605
ALKBH3	499.912	0.98294	up	0.00063031
INTS7	624.337	0.982902	up	0.0030092
SNHG12	618.703	0.982695	up	4.43691e-05
RPSA	34033.8	0.982676	up	8.57628e-05
POLA2	341.371	0.982546	up	0.00946653
COA7	344.527	0.982214	up	0.00451146
TRUB1	470.697	0.981887	up	0.000231511
FAM174B	68.25	0.981772	up	0.0220393
SIL1	184.451	0.981587	up	0.00542115
MIS18A	243.986	0.98011	up	0.00125567
STK3	158.143	0.979218	up	0.00160378
UBB	17202	0.978904	up	0.00034514
LOC105371814	95.2682	0.978736	up	0.0100376
SNX10	999.42	0.978459	up	0.000139772
MRPS9	828.296	0.97833	up	0.00169374
NDUFB10	1356.49	0.978166	up	0.00226236
CD38	231.018	0.977935	up	0.00753213
WDR74	625.159	0.977755	up	0.0112065
TSFM	463.986	0.977651	up	0.00512665
TBC1D7-LOC100130357	95.2532	0.977641	up	0.0138111
CYTOR	916.37	0.977467	up	0.0289188
SNORA8	96.891	0.977273	up	0.00341049
GPN1	1444.78	0.977257	up	0.000447435
RTCB	2019.99	0.976958	up	0.00216534
TRAP1	843.684	0.976801	up	0.00471404
HIBCH	378.417	0.976722	up	0.000813457
ATG10	107.299	0.976089	up	0.0304061
TMPO	3624.33	0.976011	up	2.86924e-05
RPS17	21979.9	0.97542	up	0.000155184
RMND5B	563.796	0.975342	up	0.00487345
GTPBP8	447.609	0.974489	up	0.0023204
PTCD1	375.032	0.974211	up	0.00417661
COMMD4	711.125	0.974037	up	0.00159742
XRCC6	10018.8	0.973753	up	4.90147e-05
ALDOA	2998.19	0.973745	up	0.0330409
WRB-SH3BGR	76.537	0.973617	up	0.0180947
ATP5MG	4092.11	0.973506	up	0.000654882
AP3M2	543.603	0.973483	up	8.31534e-05
ACP1	2758.49	0.972649	up	7.25733e-06
SLC39A14	398.201	0.972495	up	0.01139
RAB33A	137.105	0.972291	up	0.00945878
WDR61	1011.08	0.972118	up	1.75611e-05
MED30	431.449	0.971769	up	0.000133878
MCMBP	1673.79	0.971132	up	0.00447115
ABHD5	376.875	0.971047	up	0.00677676
NEDD8	1595.68	0.96912	up	0.00185737
RNASEH1-AS1	150.915	0.968307	up	0.00922011
CBFB	1584.11	0.967998	up	2.58362e-05
AGPAT5	935.113	0.967601	up	8.49737e-05
BCAS2	1144.88	0.967551	up	1.26737e-05
UHRF1BP1L	1286.16	0.967379	up	0.00170878
TRA2B	5417.58	0.966807	up	3.67748e-05
NUP58	1113.86	0.966664	up	0.00308542
RBM34	1647.3	0.966298	up	0.000136995
POC5	447.982	0.966072	up	3.46036e-05
MRPL53	589.332	0.965826	up	0.0168493
APRT	2100.81	0.965822	up	0.00372566
DPM2	544.048	0.965444	up	0.00540796
C11orf1	334.542	0.965299	up	0.00120764
TIPRL	1458.46	0.964762	up	0.0007547
PDCL3	610.846	0.964581	up	0.0018971
REXO2	867.726	0.964062	up	0.000776545
ATP5PO	3072.58	0.963961	up	0.000240162
TAF1A	277.654	0.963826	up	0.000111045
COX14	482.513	0.963748	up	0.000606413
KYAT3	883.519	0.963144	up	0.00122324
PFN1	11308.9	0.963041	up	0.00800106
DBF4	1020.25	0.962213	up	1.21474e-05
CCDC43	455.923	0.96193	up	0.000917682
IPO7	3245.09	0.961531	up	3.74159e-05
RNASEH2B	1233.24	0.961077	up	0.00015661
TUBB4B	922.51	0.960299	up	0.0439343
PARK7	6154.17	0.959969	up	0.00195449
CAPRIN1	4341.69	0.95963	up	0.00011509
RAB11FIP1	783.079	0.959066	up	0.0324422
TOPBP1	2285.87	0.958981	up	8.15131e-06
SRP19	1498.77	0.958501	up	0.000122668
UROD	1083.88	0.95825	up	0.000448677
IFRD1	1227.58	0.958119	up	4.28726e-05
POP5	549.105	0.957397	up	0.000182568
SRP72	4283.51	0.957282	up	1.69334e-06
NARS1	3920.92	0.95686	up	4.08064e-05
CWC27	797.189	0.956791	up	0.000194121
NCBP2	2186.12	0.9564	up	0.00085832
RPGRIP1L	141.144	0.956314	up	0.00313037
RPL23	24398.3	0.95547	up	0.000677987
SBDS	1364.15	0.955351	up	2.14537e-05
SLC35B1	806.433	0.955311	up	0.00300626
BUB3	4529.77	0.955242	up	3.91999e-06
VPS29	1384.41	0.955088	up	2.40036e-05
ZUP1	506.734	0.955072	up	9.69592e-05
METTL2B	457.06	0.954901	up	0.0036611
AKR1A1	1349.91	0.953691	up	0.000159424
ANP32E	4109.72	0.953675	up	0.000130749
ABRACL	1482.36	0.95359	up	5.82763e-05
EEF2KMT	221.705	0.953552	up	0.02474
USP1	1894.09	0.952414	up	0.000677987
PSMG3	419.671	0.950781	up	0.0237735
SPRYD7	241.712	0.950324	up	0.00118832
MRPL30	990.332	0.950239	up	0.000434888
YARS2	564.777	0.950064	up	0.00122948
EIF3CL	2768.35	0.949868	up	0.000346293
SELENOK	1194.1	0.949689	up	0.000192549
ARMC1	1230.92	0.948514	up	1.35593e-06
AHSA1	2239.28	0.948262	up	0.00354021
LARP1B	579.1	0.9481	up	0.000804324
WDR53	316.079	0.948065	up	0.0010671
TRMT11	538.687	0.947932	up	3.49317e-05
PGM2	892.168	0.947907	up	2.07414e-05
CEP57L1	237.855	0.947889	up	0.000259161
TMX1	1489.55	0.947269	up	5.78496e-06
COX5B	1941.24	0.947016	up	0.00199777
DMAC1	722.212	0.946778	up	0.00070745
XBP1	2849.68	0.945745	up	1.56073e-06
RAP1A	3147.4	0.944692	up	2.57832e-05
TRMT10A	165.757	0.943866	up	0.00201219
NDUFA1	1587.73	0.943452	up	0.00214135
LSM1	1019.27	0.943398	up	0.00032941
DCTN6	655.052	0.94326	up	0.000887868
TNFAIP8	6455.33	0.943113	up	0.000459372
C17orf75	452.335	0.942445	up	0.000363824
ZCCHC4	279.318	0.942419	up	0.000493788
EMC6	273.553	0.94237	up	0.0140872
CDKN2AIPNL	341.59	0.941372	up	0.0171257
SHMT1	124.392	0.941286	up	0.0331214
POP4	1242.98	0.941215	up	0.00120875
PSMD13	3162.34	0.941001	up	0.00195314
TTC33	750.417	0.940806	up	9.90095e-06
RRP36	854.093	0.939719	up	0.00146338
TMEM68	460.945	0.938769	up	0.0011938
NRM	145.861	0.93793	up	0.0113259
PALB2	473.548	0.937787	up	4.12528e-05
SLC25A32	985.396	0.937402	up	0.0023204
SLF1	542.748	0.937093	up	0.00366045
CMTM6	6855.56	0.93621	up	0.000570297
EMC7	1029.32	0.935529	up	0.000144864
CDCA4	479.828	0.93551	up	0.0314105
TBRG4	939.071	0.935151	up	0.011811
COPS8	1165.7	0.934484	up	3.42554e-05
PAAF1	322.888	0.934156	up	0.000511566
UQCR11	1884.22	0.933843	up	0.002738
SRA1	631.81	0.933354	up	0.0283324
RFWD3	982.621	0.933029	up	0.000461429
TRAPPC2L	641.807	0.9328	up	0.0052279
DNAJC17	430.562	0.9327	up	0.000929062
COX7C	4601.6	0.932637	up	0.000949911
CNPY2	1424.09	0.932558	up	0.00239969
GTSF1	114.813	0.932408	up	0.00466952
GALE	236.945	0.930856	up	0.0232991
PSMD4	3023.9	0.930616	up	0.00206359
YWHAH	962.143	0.930104	up	0.0119903
PDZD11	402.474	0.92977	up	0.000253567
SINHCAF	1822.42	0.929737	up	0.000813777
AOPEP	63.327	0.929716	up	0.0338668
ZCRB1	1278.68	0.929705	up	0.00135677
SELENOT	3411.68	0.929566	up	1.22893e-06
BCS1L	334.252	0.929449	up	0.0125414
DEK	4938.97	0.92914	up	2.40803e-06
STX3	484.12	0.928901	up	0.00926775
TIMELESS	447.987	0.928753	up	0.00872356
GNG10	331.355	0.92823	up	0.00185098
BPNT1	691.256	0.92816	up	0.000644061
MTX1	463.483	0.926726	up	0.00632864
C16orf91	235.805	0.926509	up	0.0267789
RRP9	302.883	0.925994	up	0.0225501
NDUFA11	1455.79	0.925702	up	0.00508529
RAE1	826.726	0.925583	up	0.00493462
DNAJC25-GNG10	330.076	0.924961	up	0.00211744
LOC105372480	105.228	0.924583	up	0.00943481
HNRNPA2B1	17601.9	0.924071	up	0.00026295
USP12	2776.67	0.92325	up	0.00666463
BTF3	12666	0.922336	up	0.000244651
GFM1	1392.02	0.921705	up	4.13431e-05
SDF2L1	292.88	0.921354	up	0.00164959
FASTKD3	376.035	0.921287	up	0.000176142
PPP2R1B	855.297	0.921267	up	0.0011938
PARP2	440.718	0.921172	up	0.00443679
GDI2	6803.68	0.920764	up	1.50153e-05
TM6SF1	149.341	0.920054	up	0.0499705
CALM3	2083.78	0.919935	up	0.0101099
TMEM70	721.886	0.919835	up	0.000714576
ZHX1-C8orf76	195.551	0.919528	up	0.0142932
ATP5IF1	1163.96	0.919175	up	0.00484313
EIF3E	11964.4	0.918943	up	0.000126589
RWDD1	1652.99	0.91891	up	0.000554807
COX5A	956.996	0.918518	up	0.0418175
FMC1	95.3142	0.917544	up	0.0182178
CNBP	12281.6	0.917523	up	2.62367e-05
ARL6IP6	478.869	0.917514	up	9.46778e-05
DARS1	2907.82	0.916739	up	0.000412977
EBPL	153.233	0.916595	up	0.0417618
GPANK1	453.52	0.916494	up	0.037662
CCNC	1563.3	0.916455	up	2.47682e-05
ATP5MC2	4422.24	0.916289	up	0.0007064
PSMC4	2101.84	0.91595	up	0.00410997
RPL36AL	4719.09	0.915922	up	0.000303879
MRPL9	1090.39	0.915341	up	0.0037518
PCCB	482.872	0.915143	up	0.0076719
PSMD8	2674.5	0.915016	up	0.0103259
ERVK3-1	611.592	0.914818	up	0.000985548
RPE	615.547	0.914601	up	6.303e-05
RPLP0	59555.5	0.913959	up	0.000788302
CIAPIN1	920.166	0.91293	up	0.00248727
NARS2	253.111	0.912656	up	0.00536923
C2orf76	169.056	0.912397	up	0.0123138
ZNF519	112.51	0.912343	up	0.0137551
CAPZA1	8335.97	0.911487	up	1.52863e-05
NDUFC1	572.235	0.910934	up	0.000559579
ZPR1	1082.02	0.910811	up	0.00279547
COQ5	653.687	0.910391	up	0.000789884
CNOT9	1745.16	0.9094	up	0.00347305
SRR	437.545	0.909198	up	0.00212924
VTA1	1698.51	0.909002	up	4.20799e-05
TAF9	1445.48	0.908786	up	1.22636e-05
DNAJC19	686.816	0.908564	up	0.000245436
SUMO1	2683.48	0.908091	up	0.000724091
PAK1	392.969	0.907998	up	0.000443301
BLOC1S2	1688.01	0.907939	up	0.00103722
ARL3	409.488	0.907452	up	0.0183779
PTRHD1	216.888	0.907325	up	0.0112065
MTREX	2185.1	0.907252	up	5.73101e-05
SPDYA	54.5751	0.906907	up	0.0312231
PFDN1	1072.8	0.906884	up	0.000953422
SPATA5	309.336	0.906755	up	0.000859178
GAR1	380.066	0.906045	up	0.0224644
OAZ3	111.235	0.905964	up	0.0159256
ATP6V1C2	681.963	0.905708	up	0.000626389
SCOC	1165.21	0.905546	up	2.58294e-05
SASS6	535.182	0.903549	up	0.0024953
IMPA1	1011.07	0.902746	up	5.82323e-05
MRM2	448.52	0.900397	up	0.0161625
PITPNB	2817.86	0.900357	up	0.000422652
CBWD6	376.73	0.900227	up	0.00195848
MAP7D3	494.315	0.899995	up	0.0091953
SLC25A12	549.754	0.899908	up	0.000126629
TNFAIP8L2	323.11	0.897643	up	0.00114816
RAD1	698.831	0.897509	up	0.000751379
EIF3I	2921.57	0.897431	up	0.0160354
MCTP2	1114.68	0.897419	up	0.000661654
ICMT	827.627	0.897355	up	0.0137429
SELENOI	1203.3	0.897303	up	0.000446755
CIAO2A	1165.03	0.897206	up	0.000236106
C15orf41	126.029	0.896621	up	0.0125414
NEDD8-MDP1	809.994	0.896486	up	0.0044835
ZNRD1	558.342	0.896443	up	0.0343875
CSTF3	639.87	0.896165	up	8.58494e-05
CRSP8P	135.9	0.895447	up	0.0442509
HSPA13	1408.89	0.89482	up	9.91307e-05
OGFOD1	1084.82	0.894342	up	0.00270341
OBI1	739.814	0.894303	up	4.3503e-05
CALU	1266.39	0.893185	up	0.000107063
GPAM	370.724	0.893094	up	0.00342922
ARMT1	684.68	0.892562	up	4.97183e-05
TRMT112	2024.98	0.892454	up	0.0215356
PMF1	817.707	0.892451	up	0.0181524
COMMD3	1026.82	0.892071	up	0.00162478
LEO1	808.304	0.891853	up	5.75575e-05
BZW1	9706.21	0.891815	up	6.4933e-05
MED27	347.166	0.891771	up	0.0128323
KRR1	2668.26	0.890599	up	6.97492e-06
MTMR2	979.452	0.890255	up	0.0167219
CASP7	824.95	0.890058	up	6.31912e-05
NSMCE4A	1067.51	0.890022	up	0.000151559
MOSPD1	350.196	0.8895	up	0.00217903
ANXA2	3915.13	0.889431	up	4.74644e-05
CCDC25	777.87	0.888339	up	0.000308694
RBL1	578.114	0.888313	up	0.00563634
RPL7	14291.9	0.886321	up	0.00101503
TUBA1A	1802.41	0.886278	up	0.000225133
TMEM208	724.469	0.886237	up	0.00444908
INO80C	234.633	0.886158	up	0.000697737
PCK2	339.42	0.885905	up	0.0313697
IMMT	2436.67	0.885723	up	0.000304771
LOC107986694	83.2618	0.885578	up	0.0361839
ERAL1	672.227	0.885535	up	0.0270932
ICAM1	419.636	0.884486	up	0.0485
EARS2	312.732	0.884283	up	0.00310651
SNORD104	121.95	0.883245	up	0.0171907
MCRIP2	203.846	0.883084	up	0.0317454
TMED3	551.708	0.881816	up	0.0260971
ACADM	1551.23	0.881751	up	2.60269e-05
AURKAIP1	795.349	0.881543	up	0.0320251
TMEM14A	231.793	0.880878	up	0.00383066
ZCCHC9	589.541	0.880616	up	0.000229892
WRN	852.883	0.8806	up	0.000995093
ATPSCKMT	319.81	0.880522	up	0.00556716
C11orf58	5022.06	0.879884	up	1.94699e-05
ME2	1841.71	0.879851	up	0.000296463
MYL6	10995.1	0.879792	up	0.00212649
PRPS2	671.404	0.879255	up	0.000213083
LOC105376392	148.592	0.878816	up	0.00909852
UFD1	1263.26	0.878557	up	0.00408102
PARL	1023.39	0.878264	up	0.00291645
KRTCAP2	1437.81	0.878165	up	0.00110055
DNAJC2	1211.72	0.878051	up	0.000419387
SORD	171.756	0.877945	up	0.021001
LIN52	363.559	0.877691	up	0.0222493
DAP3	2568.47	0.877574	up	7.42252e-05
RPL37A	21349.8	0.877389	up	0.0236808
SHQ1	561.952	0.8771	up	0.00101152
SEPTIN8	358.569	0.876905	up	0.0452449
OAT	1304.09	0.876649	up	7.05317e-05
CCZ1	939.609	0.876472	up	0.00103557
RPS27L	2218.08	0.876335	up	0.0186088
LSM10	915.895	0.875902	up	0.000363636
BORA	376.829	0.875858	up	0.000477385
ARPC1A	578.401	0.875486	up	0.00244163
XPOT	3259.89	0.875461	up	0.00345256
RPL36A	1776.52	0.875101	up	0.00189796
DYNC1LI1	1004.82	0.874917	up	0.00043971
CDKN2C	119.345	0.874531	up	0.0200679
AKIP1	227.71	0.874496	up	0.0406266
CYTIP	6613.64	0.873793	up	0.00884128
ETFB	586.215	0.873691	up	0.00705439
ZCCHC17	713.344	0.872972	up	0.00115575
MSH3	320.665	0.87296	up	0.00188553
SHLD3	184.088	0.872639	up	0.00529755
PIGU	450.818	0.872628	up	0.00435988
ATP23	169.576	0.872406	up	0.0254419
FUNDC2	1381.64	0.871476	up	0.00136462
PRKAG1	1379.58	0.871294	up	0.00260519
EIF2D	1015.44	0.870585	up	0.00122116
FUOM	205.725	0.870474	up	0.00996152
GOLT1B	1241.42	0.870079	up	1.34647e-05
C12orf10	321.617	0.86978	up	0.0193891
ZW10	631.956	0.86974	up	0.00159225
FAM221A	102.435	0.869186	up	0.029954
ATP5F1A	9777.99	0.869136	up	0.00010984
DDX10	722.568	0.868708	up	0.0089648
CDC23	1019.79	0.868144	up	0.0008391
CEP76	205.976	0.867205	up	0.011457
CRIP1	3467.18	0.866637	up	0.00930729
HSPH1	2858.48	0.866434	up	0.0127574
SARS1	3094.82	0.865387	up	0.00321633
QDPR	228.169	0.865312	up	0.00148255
NUTM2A-AS1	158.694	0.865203	up	0.00378844
MSH5-SAPCD1	91.7888	0.865056	up	0.0204964
MCUR1	395.579	0.864852	up	0.0399357
MTRES1	249.251	0.864628	up	0.00368867
COMMD7	759.796	0.8645	up	7.57491e-05
DDX31	384.063	0.864404	up	0.0034096
RANGRF	416.614	0.864388	up	0.00760782
POC1B	630.938	0.864387	up	0.00780092
MBIP	454.548	0.86413	up	0.000671829
PNPLA4	132.323	0.863958	up	0.029743
EPRS1	4842.45	0.863733	up	0.000202299
KATNA1	596.099	0.863216	up	0.000430104
CSTF1	897.798	0.863177	up	6.23019e-05
C8orf33	873.096	0.862661	up	0.0256026
CLDND1	9116.25	0.862435	up	0.00724829
MEMO1	808.161	0.862307	up	0.00251372
RACK1	34215.2	0.861756	up	0.000637198
FKBP1A	2001.62	0.861292	up	0.0017234
AGK	2244.22	0.860715	up	9.24436e-05
MED8	820.878	0.860647	up	0.000673785
PTGES3	5612.99	0.860376	up	0.00268726
SELENOH	1432.83	0.860255	up	0.00149681
UPF3B	636.915	0.860175	up	0.00307492
SMS	1812.88	0.859955	up	0.000320183
RNF181	1113.68	0.859915	up	0.00244766
MSH5	71.0539	0.859646	up	0.0269931
FAM174A	105.761	0.859481	up	0.011084
ATAD1	1762.63	0.859111	up	8.86984e-06
ATP1B3	3366.67	0.857962	up	0.0332219
SCARA3	451.9	0.857915	up	0.000672331
SLMO2-ATP5E	3311.99	0.857729	up	0.00217903
CLNS1A	1801.39	0.857532	up	0.00284094
NDUFAF1	373.202	0.857304	up	0.00996152
PRDX6	2945.18	0.857186	up	0.000163827
PRDX2	1299.52	0.856903	up	0.0165667
SRSF1	5052.71	0.856858	up	0.000153355
GTF3A	4297.2	0.856636	up	0.00436281
NOL7	1574.14	0.856613	up	0.0110143
UQCRC2	3330.46	0.856469	up	1.45274e-05
THYN1	1008.23	0.856203	up	0.000897908
DNAJC7	2024.58	0.856151	up	0.00100118
PLAAT3	256.864	0.856101	up	0.00486992
IL12RB2	1094.51	0.855849	up	0.0357761
DDX39B	2163.18	0.855471	up	0.00154593
SLC25A15	205.304	0.855419	up	0.0122162
RPIA	845.535	0.855263	up	0.00572116
ZMPSTE24	1514.82	0.855252	up	0.000185106
MEA1	1401.95	0.854974	up	0.00533652
DECR1	1513.47	0.854643	up	0.000192879
NUP88	1942.68	0.854045	up	4.5723e-05
TUBGCP5	367.405	0.853258	up	0.00125567
ATP6V1G2-DDX39B	2166.25	0.852854	up	0.00158237
C3orf18	133.482	0.852841	up	0.0217828
TRIB3	87.4041	0.852634	up	0.01761
TXNL1	1655.92	0.852632	up	0.00167779
ESD	1765.8	0.852196	up	0.000338198
NIPSNAP2	866.456	0.852125	up	0.00104024
ORC3	915.322	0.851945	up	0.000452328
ENOPH1	790.591	0.851734	up	0.000390013
GCH1	795.743	0.851511	up	0.00109336
RPS7	12818.8	0.851207	up	0.00142496
ATG5	1295.79	0.850716	up	0.00020866
MRPS10	1085.45	0.850555	up	0.00304096
RUSC1-AS1	560.465	0.850183	up	0.00146971
TVP23B	952.652	0.850178	up	2.47194e-05
ITGB1BP1	1099.18	0.849917	up	0.00393728
UBE2D1	444.912	0.849131	up	0.00157315
GTF2H2B	258.224	0.849087	up	0.00566942
TNPO1	3182.81	0.848669	up	9.98514e-05
ANAPC15	241.973	0.848364	up	0.0126654
FDX1	602.693	0.847851	up	0.00120977
RAMAC	559.558	0.847314	up	0.000307878
DHRSX	212.767	0.847161	up	0.0467501
IMP4	967.08	0.846461	up	0.0239716
CEP152	440.415	0.846088	up	0.00115481
RPUSD4	585.779	0.84547	up	0.00995432
NDUFAF5	304.99	0.845403	up	0.00405611
KNOP1	291.621	0.845352	up	0.00226142
RPL6	28007.1	0.845192	up	0.000985535
SET	8750.4	0.845169	up	0.0140872
WBP4	547.646	0.843867	up	0.0012445
CBR1	338.684	0.84352	up	0.0473096
IFT22	121.724	0.842331	up	0.032871
ANP32B	2936.36	0.842298	up	0.036349
DUS2	284.675	0.842255	up	0.013868
ATXN10	1321.27	0.842149	up	0.00100394
ARPC5L	1313.21	0.841924	up	0.0294263
PAFAH1B3	176.492	0.841657	up	0.0137043
PDRG1	468.988	0.841554	up	0.0244495
TDP1	1033.08	0.841275	up	0.000909216
POLB	460.706	0.841087	up	0.00327086
UBA2	3559.15	0.84106	up	0.000259619
MAD2L1BP	512.818	0.840964	up	0.000754088
RPL10A	21657.5	0.84076	up	0.00274052
THG1L	469.219	0.840388	up	0.0141409
ST7	248.042	0.840092	up	0.00423539
ACY1	90.0208	0.839878	up	0.0303953
GPR180	545.246	0.839797	up	0.00109419
MRRF	1041.5	0.839394	up	0.000786837
PEF1	1335.35	0.83911	up	0.000846788
MAPK6	1323.54	0.838832	up	4.10226e-05
ZNF90	93.1595	0.838146	up	0.0201219
GMFB	1417.11	0.837404	up	0.000673785
RPAIN	1126.73	0.836972	up	0.00170061
SUPT16H	4327.77	0.836826	up	0.00611684
RPS18	40198.4	0.836465	up	0.00370799
CEP128	123.35	0.835979	up	0.0100742
HSP90B1	8672.18	0.83588	up	4.3503e-05
HCCS	441.508	0.835051	up	0.00174166
RWDD2B	315.236	0.83486	up	0.00272169
PLGRKT	503.422	0.834403	up	0.00308771
METTL15	318.016	0.834119	up	0.000731961
SCAMP3	1369.7	0.83411	up	0.014687
PCGF1	286.763	0.833893	up	0.00113741
MECR	164.692	0.833681	up	0.0451796
RTN4IP1	211.234	0.833352	up	0.019874
POLE3	1794.16	0.833301	up	0.00167915
LOC105379193	96.2152	0.833099	up	0.0161402
DIMT1	1229.09	0.832654	up	0.000469397
ZBTB8OS	633.084	0.832229	up	0.00902577
SNORA67	84.6416	0.8322	up	0.0312902
SERPINE2	87.7831	0.8321	up	0.0249978
LLPH	929.395	0.831739	up	0.00733802
DERA	565.273	0.830988	up	0.000679009
ALKBH1	290.812	0.830899	up	0.00110367
MIR10394	2195.78	0.830846	up	0.00256967
NUP85	931.679	0.829491	up	0.00174727
NUP160	1629.71	0.82949	up	0.000648666
TMEM165	1087.92	0.828987	up	9.88083e-05
DARS2	714.852	0.827715	up	0.00105277
CEBPG	1263.6	0.827413	up	0.00429036
AP1S3	129.683	0.827021	up	0.0330409
SMIM26	658.832	0.826959	up	0.00297151
KIAA1586	308.533	0.826945	up	0.00135677
PSMD9	799.32	0.826581	up	0.00642767
UBL5	1674.61	0.826465	up	0.00378134
GHITM	6179.98	0.826379	up	0.000244651
NOP2	1150.5	0.826189	up	0.0225283
SAP18	2987.21	0.826143	up	0.00035649
FDFT1	3758.13	0.825783	up	0.000142657
GTF2E2	651.791	0.825701	up	0.00543271
C8orf37	80.9497	0.82529	up	0.0305624
C1orf109	337.183	0.82454	up	0.03121
MPHOSPH10	1359.79	0.824176	up	0.000107521
AGPS	1279.27	0.8241	up	0.00757558
SVIP	1287.44	0.823301	up	0.000698357
EEF1B2	13353.8	0.822801	up	0.00123513
BCAP29	413.754	0.822705	up	0.000271933
UAP1	728.575	0.82151	up	0.000500155
NFYB	882.802	0.821397	up	5.20784e-05
UBE2F-SCLY	480.447	0.820732	up	0.00525154
C1orf43	3066.39	0.820727	up	0.00277172
ZNF8-ERVK3-1	655.094	0.820663	up	0.00341049
MRPL55	429.305	0.820083	up	0.022195
PMS1	730.88	0.819906	up	0.000155569
EXOC6	411.474	0.819652	up	0.00279854
RNF138	817.67	0.818861	up	0.000171158
EIF5B	5067.85	0.818827	up	0.0112023
PLRG1	2334.75	0.818398	up	0.000417657
LCMT1	470.783	0.817315	up	0.0038863
METAP1D	120.006	0.817279	up	0.0235445
SS18L2	932.202	0.817067	up	0.00315858
DLAT	565.048	0.817015	up	0.00179937
SMG1P5	535.603	0.816686	up	0.00396557
GTF2H1	1359.78	0.8164	up	0.000472415
JAGN1	804.555	0.816142	up	0.022564
[truncated: 2,747 more rows]

## Sheet: Sheet3
Supplementary table 4
DGEs FC>0.5, FDR<0.05
IL2+HDMAPP vs IL2
Gene	baseMean	log2FoldChange	updown	FDR
RECQL4	328.956	1.91127	up	0.00397435
RHOB	185.251	1.8789	up	0.0330691
FADS2	108.968	1.81	up	0.0191609
PAQR4	192.063	1.79625	up	0.0180402
MYBL2	373.878	1.79151	up	0.0133124
TEDC2	96.1998	1.783	up	0.0362841
H2AX	586.589	1.72624	up	0.00540743
SLC7A5	1214.75	1.69649	up	0.00132663
PKMYT1	212.759	1.68759	up	0.00830776
FSCN1	124.594	1.64679	up	0.0436921
ATP6V0E2	233.347	1.64108	up	0.0191609
ADCK2	122.56	1.64061	up	0.0316044
PLCXD1	162.55	1.62874	up	0.04747
CDT1	180.551	1.61769	up	0.040076
ITPRIPL2	146.406	1.60694	up	0.0286575
FOSB	243.668	1.60572	up	0.0286575
EPOP	200.084	1.60463	up	0.0307508
GPR132	191.979	1.59578	up	0.0227448
PTMS	395.653	1.59325	up	0.0128023
TCF19	975.108	1.56451	up	0.00549514
NPDC1	111.306	1.55576	up	0.0444501
E2F2	125.933	1.55124	up	0.0355611
PDXP	192.165	1.5385	up	0.0481092
LMNB2	713.088	1.53023	up	0.00540743
HMGA1	824.139	1.52161	up	0.0180402
CCDC124	593.04	1.52027	up	0.045842
PHGDH	493.228	1.49648	up	0.0378
RNF187	354.428	1.49524	up	0.0353036
IER3	849.979	1.49453	up	0.0275576
VDR	373.297	1.49312	up	0.0275576
CHAF1A	334.647	1.48891	up	0.0191609
FOXM1	214.832	1.48649	up	0.0451753
NOC4L	171.447	1.47718	up	0.040076
WDR34	257.549	1.4573	up	0.0388401
KIFC1	420.412	1.45467	up	0.0145375
DHCR24	565.299	1.4539	up	0.00549514
GEMIN4	281.676	1.45237	up	0.0208067
GRAMD4	122.486	1.44661	up	0.0489985
MAZ	713.101	1.44628	up	0.0128023
CENPB	235.968	1.44428	up	0.0307508
ATAD3A	403.744	1.43026	up	0.0307508
UHRF1	463.397	1.42544	up	0.0128023
SESN2	166.789	1.42529	up	0.0349849
LOC107986126	264.773	1.42179	up	0.045842
PPDPF	252.299	1.41479	up	0.0359997
E2F1	450.005	1.41227	up	0.0261898
AP1M1	353.21	1.41079	up	0.0355611
KIAA2013	284.72	1.40894	up	0.0316044
GNB2	713.208	1.40482	up	0.03457
GTSE1	231.007	1.39426	up	0.0466253
PRXL2B	166.022	1.39104	up	0.0391102
ZNF48	202.534	1.38445	up	0.045842
CLN6	214.353	1.37988	up	0.0373341
SAMD1	254.259	1.37686	up	0.03457
RBM38	341.723	1.361	up	0.0229893
MYO1G	1557.09	1.36065	up	0.00801429
MCM5	1186.28	1.35891	up	0.0314387
UBE2M	412.419	1.34956	up	0.034268
POLD1	346.542	1.34741	up	0.0348924
WDR18	494.731	1.34383	up	0.0361624
KIF1C	266.47	1.33934	up	0.03457
SUV39H1	201.099	1.33811	up	0.047068
BOP1	536.364	1.33458	up	0.0377739
TNIP1	1337.26	1.33376	up	0.0180402
ARID5A	777.721	1.33215	up	0.0378
PLAGL2	697.824	1.33205	up	0.0191609
B3GAT3	366.409	1.33022	up	0.0330691
NUBP2	359.455	1.32957	up	0.048434
MCM2	911.232	1.32222	up	0.0191609
ZBTB32	1479.45	1.31564	up	0.0304566
MAP3K11	287.328	1.3144	up	0.0405199
GPT2	186.398	1.30976	up	0.045842
ANKRD33B	159.108	1.30558	up	0.0470922
JUND	848.97	1.30492	up	0.0286575
FHOD1	562.6	1.29854	up	0.0192783
IRAK1	744.427	1.29762	up	0.0307508
STAT5A	2179.98	1.29423	up	0.0180402
CDCA5	698.917	1.28787	up	0.0250027
KEAP1	439.143	1.2875	up	0.0391102
SEMA7A	301.249	1.28547	up	0.047068
PSMD3	825.058	1.28352	up	0.0355611
TUBB4B	1526.84	1.28119	up	0.0191609
THOP1	512.542	1.2801	up	0.0455958
DUSP4	1883.56	1.2782	up	0.00801429
LOC112268170	258.386	1.2774	up	0.0433694
SCYL1	403.97	1.27621	up	0.0477532
SPATA21	504.541	1.27365	up	0.0477848
RAD23A	585.618	1.27342	up	0.046872
SGTA	425.258	1.27209	up	0.0432486
PPP5C	641.191	1.27182	up	0.0261898
LAG3	1056.92	1.26964	up	0.0399989
JUNB	1201.46	1.2667	up	0.0286575
TMEM109	668.889	1.26622	up	0.0191609
CHTF18	220.675	1.26536	up	0.0444543
PLK3	294.995	1.26305	up	0.034128
TOMM40	656.013	1.2604	up	0.0377959
TTLL12	368.046	1.26014	up	0.0448224
ALKBH5	326.423	1.25653	up	0.0318215
GRWD1	476.322	1.24987	up	0.0349849
DUSP2	1219.71	1.24882	up	0.0218355
TRIM28	1190.74	1.24848	up	0.03457
RABL6	564.244	1.24825	up	0.0451753
MAP7D1	431.335	1.24812	up	0.045842
LIG1	489.216	1.24747	up	0.0204515
PIM3	1314.44	1.24285	up	0.0180402
TACC3	581.007	1.23857	up	0.0361624
GALNT2	257.44	1.23856	up	0.0357171
NELFB	338.277	1.23353	up	0.0405255
HDGF	2114.83	1.23132	up	0.0348924
RBM10	423.552	1.22852	up	0.0355611
SLC39A1	552.762	1.22824	up	0.0286575
PTGIR	571.731	1.22803	up	0.033993
HK1	781.159	1.22515	up	0.0180402
NUP62	742.978	1.22484	up	0.0348924
SLC1A5	1912.19	1.21843	up	0.0191609
IFRD2	622.593	1.21583	up	0.0444501
LEMD2	301.431	1.21567	up	0.0355611
SH2D2A	776.169	1.21235	up	0.0362881
SIGMAR1	837.584	1.20394	up	0.0348924
ARRB2	696.815	1.20295	up	0.0377739
NSD2	925.092	1.20259	up	0.0245443
MAPK13	786.999	1.20077	up	0.0191609
SART1	348.935	1.19728	up	0.0466253
RANGAP1	1077.56	1.18709	up	0.0307508
NSMF	257.468	1.18552	up	0.0470922
ECE1	400.229	1.18538	up	0.0333942
HDAC7	620.439	1.18479	up	0.0192783
AGFG2	281.565	1.1805	up	0.0399989
RPS6KB2	557.391	1.18023	up	0.04747
PCK2	536.428	1.1772	up	0.0333942
KCNN4	399.178	1.17452	up	0.0316044
SLC38A5	424.258	1.17279	up	0.0378
TBL3	308.115	1.1655	up	0.0499344
COLGALT1	583.186	1.16345	up	0.026659
PFKL	450.721	1.16313	up	0.0380833
CSK	779.336	1.1604	up	0.0426096
ADGRG5	914.698	1.15862	up	0.0227448
NACC1	384.134	1.15808	up	0.0466253
TKT	1171.88	1.15611	up	0.0376301
CD6	639.784	1.1546	up	0.0286575
H1-10	524.046	1.14477	up	0.041718
NDUFV1	1248.65	1.14294	up	0.0316044
CBX6	604.464	1.13786	up	0.0378
TNFRSF4	1065.4	1.12899	up	0.0286575
POLE	444.724	1.1229	up	0.0355611
SLC35B2	320.356	1.11903	up	0.046318
PTBP1	1412.45	1.11761	up	0.0392814
ATXN7L3	410.515	1.11505	up	0.0405199
RBM14	332.019	1.10633	up	0.049304
CCND3	754.781	1.10507	up	0.0331372
SMG5	753.286	1.10447	up	0.0307508
PLEKHJ1	459.419	1.10322	up	0.0466253
MTA2	1393.43	1.10239	up	0.0313822
HIRIP3	632.116	1.10101	up	0.0489985
PTPA	661.888	1.09975	up	0.0391102
GTF3C5	543.172	1.08612	up	0.0405199
SUPT5H	658.383	1.08595	up	0.0433694
FERMT3	897.897	1.08463	up	0.034128
DDIT4	390.442	1.08459	up	0.0466253
LSP1	3821.47	1.08425	up	0.0457
FARSA	813.046	1.08044	up	0.0489985
HNRNPA0	1287.24	1.07791	up	0.0229473
FLII	707.667	1.06726	up	0.0444501
USP5	542.329	1.05215	up	0.045842
SF3B2	1290.16	1.05046	up	0.0489985
SSRP1	2455.54	1.04744	up	0.0333942
AKT1	692.705	1.04687	up	0.0489985
RCC2	1284.3	1.04527	up	0.0348924
EIF4G1	1339.05	1.04145	up	0.0349849
DHX30	644.745	1.03797	up	0.045842
HNRNPAB	2602.42	1.03681	up	0.0330691
TRIM26	542.66	1.0251	up	0.0457
CCR7	1610.77	1.02252	up	0.0405255
P4HB	2352.67	1.02245	up	0.0457
NFE2L1	785.84	1.01643	up	0.0405255
MFSD10	949.13	1.01425	up	0.041718
TMBIM1	649.74	1.01217	up	0.046872
SHMT2	4061.39	1.01184	up	0.0405255
DNMT1	982.518	1.01167	up	0.04747
SDF4	836.221	0.996917	up	0.0477402
SUMF2	755.209	0.994328	up	0.0492704
GRK2	1614.88	0.993338	up	0.0388401
NFKB2	2056.9	0.988975	up	0.0337578
ADGRE5	1694.09	0.985644	up	0.0333942
SPN	792.618	0.982209	up	0.045842
PPM1G	1719.54	0.981796	up	0.0457
SAFB	652.319	0.977207	up	0.0481092
PRF1	2421.65	0.969136	up	0.0378
BCL2L1	4347.22	0.951026	up	0.0466253
MCM7	4324.34	0.949296	up	0.0457537
HNRNPM	1939.93	0.908425	up	0.0489985
SEPTIN7	7156.24	-0.874174	down	0.0468333
USP16	2378.58	-0.887951	down	0.0470922
SEC62	2296.19	-0.895121	down	0.045842
COPS2	2758.58	-0.89607	down	0.045842
SELENOF	3904.66	-0.901854	down	0.041718
NMD3	1881.97	-0.909907	down	0.0482866
TBK1	1421.97	-0.917355	down	0.0466253
CAPZA2	2311.1	-0.928684	down	0.0396968
FYTTD1	2183.49	-0.933992	down	0.0457
NDUFA5	1407.74	-0.939129	down	0.0489985
ESF1	926.172	-0.940355	down	0.0483562
LARP7	1723.58	-0.940805	down	0.0405255
ARHGAP15	1823.08	-0.942058	down	0.0489985
ZNF22	1604.77	-0.946972	down	0.0457
SCOC	1238.58	-0.94826	down	0.0457
ZNF267	2378.09	-0.950105	down	0.0368224
TMEM87A	1454.15	-0.955355	down	0.0481092
USP15	2757.76	-0.955472	down	0.0439474
CYB5R4	923.604	-0.955593	down	0.0466253
CEBPZ	2920.43	-0.958646	down	0.0337303
CD96	6383.78	-0.959908	down	0.0307508
C21orf91	1357.9	-0.962534	down	0.0482646
GMFB	1481.09	-0.962809	down	0.0466253
TARP	8840.48	-0.97383	down	0.0286414
KLRK1	3504.38	-0.975515	down	0.0318215
MRPL50	1345.01	-0.987964	down	0.0381959
ARL14EP	1215.43	-0.990687	down	0.0466253
SHOC2	1430.37	-0.994512	down	0.045842
B2M	142926	-0.9949	down	0.0245443
KLRC4-KLRK1	3603.53	-0.996002	down	0.0306024
RPS27	5924	-1.00665	down	0.0489985
PUS7L	809.283	-1.0131	down	0.0457
COMMD8	653.489	-1.01328	down	0.046872
GSKIP	716.121	-1.01527	down	0.0466253
KBTBD8	583.054	-1.01653	down	0.0466253
TWF1	890.874	-1.0169	down	0.0467243
TBC1D15	1300.5	-1.02214	down	0.0388401
CLK1	1955.74	-1.0222	down	0.04747
ATF2	1158.69	-1.02494	down	0.0456689
DYNLT3	869.461	-1.02578	down	0.0444501
CD48	6891.96	-1.02766	down	0.0388401
TRAT1	1399.19	-1.04054	down	0.0331372
STXBP3	1329.44	-1.04226	down	0.0377739
SDCBP	2138.82	-1.05065	down	0.0361624
TVP23B	988.288	-1.0554	down	0.0313822
IMPA1	1063.94	-1.05908	down	0.0378523
CASP4	1729.62	-1.0614	down	0.0313822
TANK	2844.52	-1.06197	down	0.0191609
ZFAND6	946.601	-1.06719	down	0.0364118
ELMOD2	610.288	-1.07022	down	0.041718
EVI2A	2423.64	-1.081	down	0.0227448
CLEC2B	1289.65	-1.08322	down	0.0245443
LMBRD1	684.503	-1.08716	down	0.0489985
LTN1	1146.06	-1.099	down	0.0378523
GIMAP2	1042.38	-1.09983	down	0.03457
UFL1	1011.9	-1.10627	down	0.0457
TAX1BP1	3422.92	-1.10892	down	0.0180402
GPR183	907.916	-1.11359	down	0.0388401
TRAM1	3400.43	-1.11564	down	0.0286575
ZBTB1	1757.16	-1.11567	down	0.0399989
PCMTD1	722.109	-1.11572	down	0.0470922
HSPA13	1472.57	-1.11622	down	0.0313822
FBXO3	503.474	-1.12376	down	0.0466253
WASHC4	1351.38	-1.13102	down	0.0481092
LRIF1	575.08	-1.13489	down	0.0429604
CTSS	1122.81	-1.14089	down	0.0349849
ZNF91	358.011	-1.14144	down	0.0481092
SLC35A1	465.788	-1.15022	down	0.0335778
BCL2A1	1213.71	-1.15947	down	0.0349849
DNAJB14	1123.27	-1.16274	down	0.045842
ARFIP1	434.975	-1.16752	down	0.0399989
MANEA	572.984	-1.17489	down	0.0399989
OTUD6B-AS1	618.006	-1.17542	down	0.0269927
PLSCR1	344.714	-1.1794	down	0.045842
HBP1	826.218	-1.18016	down	0.0377959
FOXN2	1330.62	-1.20207	down	0.0243506
MTM1	335.721	-1.20612	down	0.0439474
PIBF1	441.71	-1.21375	down	0.03457
FGFR1OP2	1714.85	-1.21802	down	0.0180402
RB1CC1	1052.32	-1.21982	down	0.0286575
TMEM106B	900.573	-1.22158	down	0.0318354
HSD17B11	873.161	-1.23196	down	0.0286575
CCR5	589.565	-1.23218	down	0.0348924
ATP6V1G1	1603.53	-1.24159	down	0.00830776
TIPARP	1418.04	-1.24295	down	0.0180402
ENPP4	835.453	-1.24554	down	0.0245104
ABHD13	771.671	-1.24932	down	0.0235398
CHD9	466.12	-1.25492	down	0.0481092
PRKACB	3014.46	-1.26895	down	0.00625319
ZBTB6	564.457	-1.27314	down	0.0235398
EVI2B	1941.43	-1.28022	down	0.0208067
RCBTB2	1042.39	-1.28061	down	0.0105193
ADD3	1279.81	-1.28631	down	0.0355611
KRCC1	634.345	-1.30145	down	0.0180402
ARHGAP5	532.145	-1.30889	down	0.045842
CXCR6	1606.25	-1.31055	down	0.0192783
GPR18	498.134	-1.31117	down	0.0330691
ZNF254	250.294	-1.31992	down	0.0470922
GIMAP4	1676.15	-1.33343	down	0.0261898
LYSMD3	533.94	-1.3441	down	0.0180402
TXNIP	4620.54	-1.34685	down	0.0133124
ITGB1	1982.06	-1.36485	down	0.0275576
ZNF92	422.323	-1.3652	down	0.03457
RICTOR	1325.8	-1.3763	down	0.0406338
GIMAP7	1403.91	-1.38695	down	0.0192783
PLAAT4	762.744	-1.39237	down	0.0192796
PTPRC	15623	-1.41016	down	0.0192783
SLFN5	849.181	-1.43352	down	0.0448224
TRIM23	227.799	-1.44267	down	0.0313822
IFITM1	2801.4	-1.44548	down	0.0192783
ANKRD12	2969.28	-1.44732	down	0.0191609
CXCL9	1581.43	-1.44889	down	0.00540743
PTPN4	1488.67	-1.45388	down	0.00540743
SAMD9	1254.28	-1.46404	down	0.00801429
GVINP1	803.599	-1.46464	down	0.046318
RESF1	3112.77	-1.46477	down	0.01416
KDM7A	603.321	-1.478	down	0.0405255
CARD16	303.984	-1.48879	down	0.0377739
MORC3	1104.48	-1.48898	down	0.0191609
SAMSN1	4874.14	-1.54511	down	0.00132663
HLA-DMB	454.937	-1.56404	down	0.0192783
RAPGEF6	1167.04	-1.56508	down	0.0227448
RUBCNL	184.395	-1.60521	down	0.045842
ATP8A1	1025.53	-1.64435	down	0.0337804
LY9	350.705	-1.65253	down	0.0180402
SENP7	498.425	-1.65631	down	0.0275576
TCF4	239.801	-1.68059	down	0.0457
LPAR6	2852.74	-1.68947	down	0.000328749
HERC6	140.517	-1.69396	down	0.0391102
SAMD9L	1356.1	-1.74948	down	0.00830776
DDX60L	397.466	-1.7873	down	0.0286575
LOC283788	400.217	-1.78773	down	0.0318215
KLRC2	632.602	-1.79894	down	0.0191609
SESN3	306.472	-1.80363	down	0.0191609
C1orf162	239.361	-1.81326	down	0.045842
MYBL1	578.455	-1.81699	down	0.0192783
SCML4	244.163	-1.84541	down	0.0444501
DDX60	532.346	-1.87942	down	0.00540743
IGLL5	195.007	-1.88501	down	0.0396968
MS4A1	2811.02	-1.89282	down	0.00540743
ARHGAP12	145.69	-1.89675	down	0.0388401
DDX58	468.347	-2.00392	down	0.00780643
IFI44L	177.26	-2.03164	down	0.0353036
TXK	287.337	-2.04902	down	0.0286575
RALGPS2	218.536	-2.06458	down	0.0212666
LOC107986639	211.474	-2.10476	down	0.0348803
ARRDC3	1662.84	-2.11445	down	0.000786215
CREBRF	787.332	-2.12938	down	0.00543945
ABCD2	417.575	-2.13305	down	0.00830776
KLRC4	189.822	-2.16552	down	0.0208067
IL7R	4459.73	-2.17243	down	0.000328749
LOC107986589	148.784	-2.18785	down	0.0444501
KLRC3	454.468	-2.20527	down	0.00625319
TLR1	133.446	-2.28831	down	0.0191609
TFEC	129.085	-2.32092	down	0.0245443
CXCL10	611.398	-2.47594	down	0.000328749
CCR2	269.283	-2.6483	down	0.00540743
CD200R1	139.977	-2.78498	down	0.0191609
HLA-DRB5	386.913	-23.9432	down	0.00830776

## Sheet: Sheet4
Supplementary table 5
DGEs FC>0.5, FDR<0.05
IL2+IPP vs IL2
Gene	baseMean	log2FoldChange	updown	padj
FSCN1	166.23	1.69679	up	0.00453215
FADS2	127.587	1.54138	up	0.00462538
E2F2	157.906	1.48684	up	0.0125304
PKMYT1	249.011	1.44228	up	0.00462538
IL4I1	92.9326	1.4064	up	0.021488
RECQL4	346.37	1.39183	up	0.0092648
SLC7A5	1362.76	1.35598	up	0.00610845
MYBL2	399.258	1.32044	up	0.0274
PAQR4	204.791	1.31982	up	0.0247734
FGFR1	115.781	1.30846	up	0.0337745
FOSB	275.839	1.30769	up	0.0109285
MYO1C	163.522	1.2816	up	0.00610845
ADCK2	135.705	1.27521	up	0.0239472
TCF19	1102.24	1.266	up	0.00610845
CDT1	200.283	1.26274	up	0.038029
ANKRD33B	195.528	1.26224	up	0.00453215
VDR	430.197	1.25283	up	0.0353555
TEDC2	100.112	1.25253	up	0.0386195
NPDC1	125.042	1.24971	up	0.0122391
PLEKHG4	92.6208	1.24886	up	0.0217006
SAMD1	302.338	1.23742	up	0.00610845
ITPRIPL2	161.368	1.23732	up	0.0239472
C21orf58	139.118	1.23433	up	0.0274
LMNB2	802.438	1.22793	up	0.00544503
UHRF1	537.043	1.2141	up	0.00610845
ACTN1	320.038	1.20671	up	0.00453215
RNF26	172.655	1.19157	up	0.0436856
FOXM1	241.695	1.18944	up	0.0479606
DHCR24	637.419	1.17171	up	0.00584191
PHGDH	546.493	1.16645	up	0.0358152
GEMIN4	316.216	1.15843	up	0.0203026
SCRIB	299.471	1.15684	up	0.0122391
PKN3	117.396	1.1564	up	0.0202702
E2F1	510.806	1.15396	up	0.0156207
H2AX	597.484	1.15346	up	0.0230378
SMG9	290.787	1.14546	up	0.0340788
CHTF18	260.688	1.14422	up	0.00584191
TTLL12	436.262	1.14207	up	0.0155438
GPR132	203.328	1.13285	up	0.0421433
CHAF1A	365.602	1.1215	up	0.0277366
POLD1	395.371	1.11551	up	0.0239383
ST3GAL4	100.254	1.11532	up	0.0345546
DUSP4	2185.55	1.10597	up	0.00494317
GTSE1	258.1	1.09948	up	0.0476276
NUP62	873.714	1.09747	up	0.0109786
GRAMD4	134.157	1.09156	up	0.0402363
ZNF747	96.219	1.09076	up	0.0435617
CENPB	257.911	1.08721	up	0.0211517
GAA	100.557	1.08645	up	0.0464615
INCENP	178.072	1.08618	up	0.0313717
MAZ	776.753	1.08143	up	0.0141639
WDR34	279.632	1.08021	up	0.0484724
HMGA1	872.319	1.07177	up	0.0495272
PLAGL2	783.921	1.06611	up	0.0247734
SESN2	181.555	1.06537	up	0.0137485
MCM2	1025.83	1.06413	up	0.0165261
PTMS	407.397	1.06342	up	0.0464615
LOC642846	232.746	1.05851	up	0.0353555
ALKBH5	372.537	1.0463	up	0.0141639
TACC3	666.419	1.04606	up	0.0193093
TMEM184B	123.002	1.04594	up	0.0491706
PIM3	1503.71	1.04379	up	0.00544503
LLGL1	182.136	1.04217	up	0.0409089
MYO1G	1712.17	1.03663	up	0.0109786
ATAD3A	433.75	1.03283	up	0.0435431
ITPRIP	149.677	1.03265	up	0.0391943
PPP5C	723.915	1.03202	up	0.0144328
RBM38	375.132	1.03153	up	0.0141639
KIF1C	294.48	1.0311	up	0.0247734
FASN	454.963	1.03042	up	0.0135575
RTEL1-TNFRSF6B	98.22	1.02108	up	0.0479606
STAT5A	2429.75	1.0179	up	0.0191719
NSD2	1056.12	1.00849	up	0.00753968
FLNA	4025.94	1.00627	up	0.0224748
CAD	487.883	1.00262	up	0.0247734
EIF4G1	1597.19	1.00032	up	0.0115242
ECE1	457.866	0.999076	up	0.0100415
FHOD1	620.372	0.993649	up	0.0141639
CLUH	357.921	0.992199	up	0.0124947
ATXN7L3	477.373	0.989621	up	0.00584191
PNMA1	233.305	0.986309	up	0.0193744
LIG1	546.243	0.985393	up	0.0117979
KHSRP	914.313	0.982935	up	0.0247734
PATZ1	155.405	0.982368	up	0.0386195
C2CD4D-AS1	201.144	0.981709	up	0.0345895
PIDD1	164.625	0.980484	up	0.0251687
HCFC1	357.561	0.978369	up	0.0152863
PTGIR	640.058	0.977003	up	0.0211285
PPDPF	265.827	0.972158	up	0.0464615
HDGF	2359.47	0.97061	up	0.046429
MAPK13	884.445	0.967561	up	0.00462538
TUBB4B	1673.43	0.964819	up	0.0254475
TRIM28	1318.51	0.96466	up	0.046429
TFAP4	143.764	0.964294	up	0.0353555
RTL6	111.746	0.963838	up	0.0491706
TRIB3	154.748	0.963823	up	0.0285112
PFAS	367.446	0.961894	up	0.00896184
KIFC1	435.665	0.961721	up	0.0491715
ZCCHC3	241.767	0.96046	up	0.0336689
CBX6	690.406	0.959153	up	0.0283813
TNIP1	1438.66	0.959125	up	0.041837
SLC7A1	709.746	0.957719	up	0.00962225
IFFO2	226.267	0.953278	up	0.0478622
ZBTB32	1592.95	0.946465	up	0.0468501
GALNT2	283.893	0.944966	up	0.0332965
SART1	389.466	0.944138	up	0.0444472
PEX26	493.4	0.940602	up	0.00689593
FLOT2	666.422	0.93846	up	0.0247734
DUSP2	1334.87	0.935557	up	0.0247734
JUNB	1306.26	0.932249	up	0.0464615
COLGALT1	653.837	0.932234	up	0.00689593
SUPT5H	754.973	0.931664	up	0.0146259
POLE	503.874	0.930151	up	0.00584191
HK1	859.087	0.930124	up	0.00768512
GPT2	199.62	0.927228	up	0.0402363
TP53	464.297	0.925794	up	0.046429
PTBP1	1601.22	0.925481	up	0.0353555
ZC3H18	406.491	0.925378	up	0.0247734
IRAK1	797.768	0.919638	up	0.0436856
NACC1	429.062	0.918359	up	0.0247734
TOMM40	710.42	0.916945	up	0.046429
MOGS	402.406	0.913782	up	0.0115242
HMGXB3	341.411	0.913568	up	0.0193093
CSRNP1	268.748	0.907919	up	0.0320241
CD5	284.431	0.906146	up	0.0193093
ELAVL1	699.36	0.903213	up	0.0491954
CARM1	384.841	0.897754	up	0.0407042
ZNF367	466.054	0.897358	up	0.0435265
LOC112268170	276.327	0.89703	up	0.049844
PCK2	590.486	0.896686	up	0.0138288
RCC2	1469.23	0.895862	up	0.0203744
MEN1	236.659	0.895759	up	0.0435617
CDC25A	520.711	0.892036	up	0.0479606
TNPO2	562.693	0.891579	up	0.00768512
TMBIM1	748.226	0.890161	up	0.00620082
PLK3	316.065	0.889583	up	0.0493353
TELO2	267.151	0.889199	up	0.0239472
MFSD10	1090.62	0.888549	up	0.00610845
TKT	1295.02	0.888396	up	0.0353555
PFKL	496.315	0.885657	up	0.0202345
WDTC1	229.068	0.883767	up	0.038029
GUSB	364.589	0.883332	up	0.0407042
SKA1	426.273	0.882174	up	0.0313717
GRK2	1860.89	0.877852	up	0.00610845
HNRNPA0	1447.46	0.876676	up	0.00539533
MTA2	1556.95	0.876624	up	0.0293372
TAF6	239.273	0.874409	up	0.0345546
DDIT4	437.285	0.87438	up	0.0152863
HDGFL2	250.375	0.874212	up	0.0317703
SLC25A22	219.218	0.873795	up	0.0479606
CCND3	841.445	0.872357	up	0.0316511
CD6	702.666	0.871216	up	0.0260778
HDAC7	675.124	0.870868	up	0.0211285
DVL2	307.388	0.870573	up	0.023495
STING1	191.721	0.870402	up	0.0484724
NCK2	414.572	0.869224	up	0.046429
STIM1	333.119	0.869198	up	0.0251512
ZC3H4	251.851	0.867786	up	0.0407042
NFKB2	2363.58	0.867662	up	0.00610845
DNMT1	1121.91	0.866575	up	0.0281238
H1-10	575.728	0.863994	up	0.0353555
SSBP3	332.016	0.861169	up	0.0479606
ATXN2L	976.304	0.8605	up	0.0141639
HAUS5	239.963	0.859483	up	0.0491706
EHBP1L1	465.993	0.859463	up	0.0386195
NFE2L1	892.86	0.858546	up	0.00610845
TBL3	335.752	0.857599	up	0.0491706
TRIM41	323.858	0.8538	up	0.0239383
SMARCA4	386.105	0.85037	up	0.0391943
KCNN4	431.965	0.848253	up	0.0217482
POLR2A	589.673	0.847348	up	0.0193744
FLII	789.398	0.846001	up	0.0247734
FERMT3	995.638	0.843547	up	0.0169847
SH3GL1	231.686	0.841595	up	0.0464615
KCNAB2	878.77	0.840639	up	0.0458443
ZC3H7B	530.844	0.828942	up	0.0345546
MRPL49	873.787	0.825331	up	0.0464615
UPF1	430.201	0.82306	up	0.043091
KIF11	999.719	0.816995	up	0.0436856
EMD	471.689	0.816034	up	0.0388544
NOP9	401.258	0.814971	up	0.0239383
HNRNPUL2	726.8	0.814956	up	0.0247734
COQ8A	257.876	0.814077	up	0.0464615
KIF3B	962.012	0.811519	up	0.0385948
SUMF2	848.48	0.810036	up	0.0358152
PIM2	1411.34	0.809573	up	0.0193093
DOT1L	562.907	0.806332	up	0.0251512
SLC35B2	346.569	0.803822	up	0.0323195
SPN	891.152	0.803796	up	0.0387366
SLC1A5	2007.62	0.803672	up	0.0484724
CTBP1	614.62	0.803373	up	0.0203744
ADGRE5	1900.78	0.80212	up	0.0137485
SLC38A5	451.449	0.801082	up	0.0464615
CLSPN	784.736	0.798789	up	0.0298414
ESPL1	462.882	0.798028	up	0.0299927
LARP1	936.267	0.798022	up	0.0388544
PFKP	680.351	0.793431	up	0.0479606
PNPLA6	394.712	0.79317	up	0.0493353
DDX54	514.753	0.793081	up	0.0353555
MYBBP1A	394.773	0.789374	up	0.0392403
NCAPD2	731.143	0.788977	up	0.04948
PLEKHJ1	496.038	0.785778	up	0.046429
PPP1R9B	427.08	0.783949	up	0.038029
BSG	1459.63	0.783196	up	0.0493714
INTS1	270.602	0.781877	up	0.0479606
DVL1	269.981	0.781519	up	0.0386195
MGAT4B	319.655	0.780186	up	0.0362413
RETREG2	415.326	0.779157	up	0.048573
LMNA	1406.88	0.777234	up	0.0477004
TNFRSF4	1133.88	0.769148	up	0.0253086
HNRNPAB	2837.13	0.761966	up	0.0353555
AKT1	751.284	0.755081	up	0.0491715
ARHGEF1	1174.35	0.754802	up	0.0170227
SSRP1	2657.59	0.75009	up	0.0491706
TXLNA	957.108	0.746676	up	0.0435617
KAT2A	390.341	0.745986	up	0.0353555
EDEM1	1622.87	0.739124	up	0.0141639
SREBF2	717.591	0.735622	up	0.0436682
FAM53B	364.918	0.732287	up	0.0479606
AKT2	761.72	0.722875	up	0.0435617
SAFB	712.273	0.720332	up	0.0491758
DGCR8	469.202	0.71442	up	0.046429
ILF3	2693.77	0.707735	up	0.0386195
HUWE1	1757.42	0.706203	up	0.0479606
XPO6	1228.06	0.701076	up	0.0367677
TRABD	697.496	0.685196	up	0.0464615
SART3	630.884	0.678596	up	0.0476276
APOL2	623.496	0.676146	up	0.0462983
IL4R	1330.12	0.673087	up	0.0409619
VASP	1329.13	0.672175	up	0.0450902
IRF4	3284.31	0.666695	up	0.038029
YY1	1013.97	0.656258	up	0.0479606
FMNL1	1617.29	0.654304	up	0.0310329
TRMT1	724.412	0.65398	up	0.0491706
HGS	618.866	0.653269	up	0.0491954
AKAP17A	722.629	0.624652	up	0.0471469
TYK2	915.027	0.623338	up	0.0447624
PSME1	6155.89	-0.563987	down	0.0407042
ARF4	2416.12	-0.5686	down	0.0491954
SKP1	5648.59	-0.579767	down	0.0479606
PPP1R2	1761.19	-0.581244	down	0.0491715
PTPN2	1419.82	-0.583241	down	0.0479606
CTSC	3946.11	-0.592292	down	0.0478779
CHMP2B	1051.96	-0.595895	down	0.0491715
ARPC3	5707.6	-0.604409	down	0.0479606
ISCU	2308	-0.612244	down	0.041837
ATAD1	1950.4	-0.615553	down	0.0391943
DNTTIP2	4194.62	-0.626143	down	0.0391943
CEBPZ	3072.06	-0.628082	down	0.0435617
SELENOT	3830.04	-0.62821	down	0.0239383
TXNDC12	1513.36	-0.629104	down	0.0436901
GLIPR1	1593.92	-0.63346	down	0.0345546
RCN2	1182.47	-0.635283	down	0.0394005
CYB5R4	969.692	-0.635391	down	0.0493318
ZNF267	2494.88	-0.636917	down	0.0435617
MOB4	731.106	-0.638258	down	0.047103
TANK	3013.89	-0.642729	down	0.038029
TC2N	1438.13	-0.645062	down	0.046429
RAMAC	612.826	-0.64768	down	0.0484724
C3orf38	746.045	-0.65059	down	0.0479606
EIF4E	1579.54	-0.655963	down	0.0268202
TVP23B	1039.89	-0.670903	down	0.0460942
CHORDC1	2268.9	-0.671207	down	0.0392403
ATP6	155242	-0.679005	down	0.0491954
CLEC2B	1358.45	-0.680606	down	0.0479606
IGBP1	1180.84	-0.682387	down	0.0331355
SELENOF	4030.1	-0.69314	down	0.0162362
TRIM21	668.988	-0.694936	down	0.0353555
SARAF	4924.27	-0.69778	down	0.0332965
CD52	6521.02	-0.699765	down	0.0345546
KLRK1	3636.31	-0.702161	down	0.0387366
LOC374443	679.566	-0.706378	down	0.038029
ABCB1	803.609	-0.707407	down	0.0491706
KLRC4-KLRK1	3742.12	-0.708241	down	0.0407042
TAX1BP1	3591.9	-0.709893	down	0.0353555
CD96	6604.12	-0.711005	down	0.00650285
KBTBD8	606.101	-0.712568	down	0.0387366
GBP4	2490.23	-0.726339	down	0.0317703
HLA-DPB1	907.181	-0.731643	down	0.0353555
SEC62	2343.06	-0.745198	down	0.0133796
COX1	320778	-0.747103	down	0.0371133
CD53	7640.65	-0.754891	down	0.00689593
CASP4	1790.6	-0.756153	down	0.0493318
ZFAND6	979.027	-0.761143	down	0.0407042
COX6A1	4004.9	-0.767414	down	0.0495272
EVI2A	2507.78	-0.770659	down	0.0353555
SLC35A1	484.729	-0.771028	down	0.0239472
LYSMD3	564.609	-0.771952	down	0.0409619
ND2	143928	-0.77339	down	0.0485153
YIPF1	461.445	-0.777664	down	0.0391943
EIF3K	4056.22	-0.780071	down	0.0186286
TRAT1	1438.14	-0.784006	down	0.0193093
CGRRF1	355.16	-0.785917	down	0.0353555
B2M	146205	-0.786442	down	0.0119309
SAMD3	1114.07	-0.787516	down	0.0122391
TRAM1	3514.74	-0.788318	down	0.033936
RPLP2	19081.2	-0.791741	down	0.0491954
ZBTB6	590.744	-0.794038	down	0.0437182
CD59	751.926	-0.801207	down	0.0310569
TIPARP	1475.53	-0.812487	down	0.0217482
HCST	1623.65	-0.814425	down	0.0239383
UBC	45212	-0.815279	down	0.00610845
CD48	7033.64	-0.816887	down	0.0365229
LMBRD1	699.374	-0.833237	down	0.0435617
MIER3	747.468	-0.834231	down	0.0485153
ARFIP1	447.387	-0.837957	down	0.0314402
SDCBP	2176.21	-0.838567	down	0.0233758
NBEAL1	4964.47	-0.838752	down	0.0239472
FAU	10386.8	-0.839887	down	0.0273247
RPS15	15500.1	-0.845227	down	0.0330638
KLF10	368.228	-0.850931	down	0.0496582
ENPP4	862.961	-0.851632	down	0.041837
TARP	8897.2	-0.860909	down	0.0031326
PRKACB	3105.19	-0.881476	down	0.00773523
BCL2A1	1238.8	-0.883218	down	0.0322158
HBP1	842.85	-0.886798	down	0.0340788
NCR3	1492.45	-0.89055	down	0.00544503
RPL28	19575.2	-0.898179	down	0.0436682
FGFBP2	991.396	-0.904249	down	0.0203744
IFITM2	1048.79	-0.910434	down	0.0146259
LOC105378179	1365.39	-0.912856	down	0.00728938
LOC107987206	875.906	-0.926146	down	0.00610845
RN7SL1	875.675	-0.927592	down	0.00610845
RESF1	3224.96	-0.930349	down	0.048493
RN7SL2	1340.47	-0.930539	down	0.00610845
CBWD6	395.364	-0.935785	down	0.0331355
GIMAP4	1716.01	-0.940738	down	0.0435617
TRIM23	234.865	-0.945239	down	0.0386195
HLA-DMA	714.171	-0.961908	down	0.00610845
RPL41	12801	-0.964207	down	0.00610845
IFIT5	393.616	-0.965363	down	0.00610845
ANXA2P2	293.423	-0.969407	down	0.0139274
ATP6V1G1	1619.21	-0.97747	down	0.00610845
HLA-DMB	470.341	-0.989215	down	0.041837
SAMD9	1283.63	-0.998667	down	0.0247734
ISG15	354.295	-1.00347	down	0.0100415
GPR18	503.018	-1.01071	down	0.0247734
SAMSN1	5008.09	-1.01339	down	0.0277366
RCBTB2	1048.19	-1.02141	down	0.0031326
IFI30	620.598	-1.03663	down	0.0251582
COMMD6	1053.23	-1.04008	down	0.0211517
LINC02067	12064.4	-1.06284	down	0.0325535
PTPN4	1496.08	-1.10523	down	0.00544503
CCR5	581.64	-1.11124	down	0.00584191
SNORD141A	4019.53	-1.11441	down	0.00453215
C6orf226	106.428	-1.11581	down	0.041837
SMG1P6	95.3849	-1.1197	down	0.0479606
LPAR6	2899.71	-1.13554	down	0.00453215
CHN2	154.138	-1.13728	down	0.038029
IFITM1	2790.34	-1.1572	down	0.0332965
CASP17P	126.391	-1.15984	down	0.0484724
CARD16	302.301	-1.18627	down	0.0436856
HLA-DQA1	1715.54	-1.20396	down	0.0391943
PLAAT4	750.244	-1.21027	down	0.00859704
DDX60	540.321	-1.21132	down	0.0337745
CXCR6	1571.33	-1.2141	down	0.00584191
KLRC2	636.894	-1.24292	down	0.04948
NDUFA3	178.516	-1.28558	down	0.0239383
IL7R	4523.33	-1.32123	down	0.0355639
OASL	125.178	-1.32155	down	0.0345546
GZMA	2639.28	-1.32236	down	0.0286385
MYBL1	573.633	-1.34762	down	0.0340222
SNORD141B	394.098	-1.41191	down	0.00896184
TLR1	132.393	-1.50596	down	0.049844
IGLL5	188.638	-1.57037	down	0.0299505
TOX	190.268	-1.74764	down	0.0353555
CD200R1	137.226	-1.78257	down	0.049844
TFEC	124.133	-1.80257	down	0.0165685
TLR1	141.4	-1.81357	down	0.00782805
SLCO4C1	60.5926	-1.84799	down	0.0354912
GCSAM	333.543	-1.85327	down	0.00448078
LOC107986639	234.125	-1.90421	down	0.00112066
BANK1	179.06	-1.9379	down	0.00298434
TFEC	128.06	-1.99764	down	0.00856951
DDX24	64.4118	-2.01058	down	0.0372053
FCRLA	67.2594	-2.05763	down	0.0274953
CD200R1	151.514	-2.0806	down	0.00782805
TOX	214.672	-2.09398	down	0.000906243
SEC22B4P	79.0093	-2.10691	down	0.00887196
BDP1	73.8402	-2.1361	down	0.00613693
B3GALT2	62.199	-2.17853	down	0.0189015
SH2D1B	102.449	-2.19663	down	0.0216342
LOC105371870	63.7166	-2.30879	down	0.0150421
MPEG1	94.9572	-2.36916	down	0.00448078
AATF	94.6182	-2.63166	down	0.00346885
FCRL5	61.0897	-2.63513	down	0.0237667
CDK7	223.815	-3.42147	down	3.74e-15
HLA-E	293.346	-3.51718	down	1.43e-14
SNHG32	163.184	-3.74563	down	1.39e-08
SCAMP3	105.727	-3.77073	down	1.56e-05
CCL4L2	359.619	-7.06361	down	0.0203105
HLA-DRB5	418.403	-25.6776	down	0.000114564

## Sheet: Sheet5
Supplementary table 6
DGEs FC>0.5, FDR<0.05
IL2+ anti-CD3 vs IL2
Gene	baseMean	log2FoldChange	updown	FDR
STC1	9.88878	7.09624	up	0.000976248
HSD11B1	9.8231	5.13329	up	0.0109376
IL17A	23.6395	4.40875	up	0.0037801
B3GNT5	188.869	3.90065	up	0.0422302
IL9	69.609	3.88963	up	0.000989817
IL3	149.832	3.73055	up	0.0239511
COL6A3	56.8949	3.12635	up	0.00831661
IL21	37.326	2.84453	up	0.0193159
MB	86.795	2.80783	up	0.0228505
G0S2	55.2377	2.79634	up	0.0114743
MYOF	87.0502	2.76041	up	0.0198888
PTGS2	32.5856	2.55576	up	0.00992425
LINC01281	84.5075	2.21489	up	1.06191e-05
LIF	182.134	2.20499	up	0.000607004
USP18	121.338	2.1554	up	0.00364129
IL2	79.0914	2.12296	up	0.000442283
PTPRK	114.006	2.12037	up	0.0462111
MYO1E	112.327	2.0271	up	1.09178e-05
CD200	340.417	2.01955	up	0.00174292
OAS3	288.758	1.96973	up	0.0466576
IQGAP3	44.7084	1.93258	up	0.0356403
CD109	261.725	1.8667	up	0.000192637
EVI5	401.074	1.64955	up	0.0113959
CIT	95.7918	1.60238	up	0.0432284
IFI6	359.831	1.53313	up	2.70056e-05
IFI44	754.518	1.53174	up	0.0221761
LINC00892	144.303	1.51713	up	0.0444962
DEPDC1	363.722	1.47095	up	0.0251488
ARHGAP11B	87.9232	1.45285	up	0.0193159
KIF20A	494.748	1.43641	up	0.00831661
ASPM	1450.68	1.43229	up	0.00265677
CENPF	1771.9	1.42948	up	0.00311078
DIXDC1	143.966	1.38004	up	0.0251488
ANLN	645.192	1.36624	up	0.0227945
MYH10	89.978	1.35023	up	0.00237835
KIF14	311.006	1.33297	up	0.0236891
CCDC150	138.723	1.33042	up	0.0071252
FAM72A	201.402	1.31899	up	0.00125389
MKI67	2100.21	1.31316	up	0.00498107
FAM72B	168.442	1.31142	up	0.0112499
STRIP2	306.206	1.29652	up	0.0272487
APOBEC3B	159.772	1.27775	up	0.019574
FAM72C	114.409	1.2743	up	0.00831661
TOP2A	4941.77	1.26267	up	0.0181603
FAM72D	175.45	1.24838	up	0.0444962
DLGAP5	1179.56	1.24348	up	0.00606819
POLQ	459.495	1.24245	up	0.000218884
KIF4A	476.024	1.23616	up	0.0467003
PRR11	558.785	1.22275	up	0.0205245
BIRC5	1170.95	1.22251	up	0.0475075
TPX2	1398.8	1.213	up	0.00344793
DIAPH3	333.417	1.20572	up	0.0413182
HMMR	1707.52	1.19117	up	0.0111146
CENPE	968.073	1.18547	up	0.0432284
HERC5	354.704	1.16104	up	0.000153008
KIF15	979.592	1.14866	up	0.000739489
KIF2C	1013.58	1.14636	up	0.000214846
E2F8	247.629	1.12562	up	0.00498695
CCNB1	2320.52	1.11025	up	3.93379e-08
NUSAP1	2635.75	1.10625	up	0.0307292
BUB1B	1081.78	1.09002	up	0.00237835
CEP55	1007.02	1.07228	up	0.0215935
KNL1	986.046	1.06213	up	0.000127473
DEPDC1B	545.307	1.05649	up	0.00831481
PRC1	1095.82	1.04025	up	0.0467003
NCAPG2	1110.46	1.03565	up	0.0180291
SPAG5	1573.28	1.00465	up	0.00992425
NCAPH	928.022	1.00399	up	0.018031
ARHGAP11A	564.643	0.992873	up	0.0159154
KIF23	957.12	0.972482	up	0.00322103
MELK	1155.12	0.972416	up	0.0410234
CCNA2	1845.12	0.958788	up	0.0227945
KIF11	938.395	0.939913	up	0.00712382
CIP2A	1141.1	0.935247	up	0.0198888
HJURP	806.534	0.931077	up	0.0181085
STIL	465.395	0.922521	up	0.0410234
SCD	647.784	0.918695	up	0.0221761
GK	445.618	0.916015	up	1.52512e-20
ECT2	858.228	0.906048	up	2.17595e-09
PLK4	1085.68	0.893517	up	0.000218884
FANCI	2796.4	0.872242	up	0.0125111
TFRC	9783.67	0.854994	up	0.00174292
CDCA7	937.783	0.839698	up	0.00712382
CBX5	1079.8	0.838632	up	0.00120872
ELL2	1330.69	0.825765	up	0.0463061
ZWINT	2051.92	0.8078	up	0.000976248
SOCS2	979.584	-0.977504	down	0.0113472
LOC105378179	1207.81	-0.99648	down	0.00214662
RN7SL2	1185.4	-1.01701	down	0.00344793
TNFRSF18	1137.16	-1.03526	down	0.0114743
FGFBP2	845.188	-1.21499	down	0.0273921
PDGFA	106.489	-1.30593	down	0.0115086
GNG4	191.567	-1.90915	down	0.000665874
KIR2DL4	42.3331	-2.03982	down	0.0352934

## Sheet: Sheet6
Supplementary table 7
DGEs FC>0.5, FDR<0.05
HDMAPP+GSI+IL2 vs IL2+HDMAPP
Gene	baseMean	log2FoldChange	updown	padj
EGR3	111.783	1.39814	up	0.00460905
CD38	347.401	1.24803	up	0.0161369
PTCH1	68.5065	1.23271	up	1.29155e-05
LTB	1734.11	1.04861	up	0.0297165
RNF213	2581.21	0.833591	up	0.0451726
WNK1	1116.54	0.764521	up	0.000347274
INPP4A	800.841	0.707679	up	0.0296417
RAB9A	1128.64	-0.774676	down	0.0343486
MYB	871.466	-0.780002	down	0.000251143
RYBP	1001.85	-0.838684	down	0.00323024
TNFSF4	1281.89	-0.977206	down	0.00313962
LINC01943	1280.01	-1.06445	down	5.34228e-05
P4HA2	91.0229	-1.14691	down	5.34228e-05
SPINT2	217.553	-1.19753	down	5.50074e-15
EVI5	292.031	-1.20052	down	0.00780626
IL23A	227.998	-1.24795	down	0.0170337
CSF2	3807.74	-1.24809	down	1.68703e-11
GNG8	649.048	-1.26248	down	0.0259564
FRMD4B	552.17	-1.27197	down	0.00437958
LOC101928152	270.588	-1.27519	down	0.00409544
LGALS1	1032.26	-1.34137	down	0.00277844
HMSD	146.814	-1.37917	down	0.00631809
SOCAR	93.7235	-1.42615	down	0.0299468
MAL	184.097	-1.49462	down	0.00852885
CD86	77.1245	-1.50322	down	0.0228823
SVIL2P	76.4639	-1.54334	down	0.0161369
BATF3	555.196	-1.57007	down	0.000206512
AIF1	55.128	-1.58255	down	6.31291e-14
CCR4	1297.58	-1.5986	down	5.89765e-11
JAML	1907.58	-1.64379	down	0.00135254
DIXDC1	121.347	-1.64633	down	0.0199067
LOC105378013	129.473	-1.75422	down	0.0147032
LOC105369313	321.057	-1.85341	down	0.000347274
LOC107987206	916.646	-1.966	down	0.00911747
RUNX2-AS1	92.6133	-1.97159	down	0.0473917
RN7SL1	915.134	-1.97314	down	2.20505e-21
LOC105378179	1296.38	-1.97327	down	0.0387394
RN7SL2	1276.77	-1.99335	down	0.0147032
LOC107986072	210.323	-2.17912	down	1.2102e-05
FCER2	91.6019	-2.48605	down	0.0473917
LOC105377022	138.218	-2.52012	down	0.0199148
LINC01281	34.0065	-2.68839	down	0.0107013
PPARG	14.9764	-2.99424	down	0.0488624
IL13	978.976	-3.10657	down	0.0161369
CCL17	541.488	-3.92259	down	3.23551e-05

## Sheet: Sheet7
Supplementary table 8
DGEs FC>0.5, FDR<0.05
IPP+GSI+IL2 vs IL2+IPP
Gene	baseMean	log2FoldChange	updown	FDR
CD38	346.418	1.33569	up	0.0448426
GPX1	1046.45	-0.879468	down	0.0102935
FRMD4B	547.695	-1.04697	down	0.00838092
LINC01943	1431.22	-1.06475	down	6.02214e-08
RPL22L1	2592.57	-1.09905	down	0.00340553
RNF125	1504.36	-1.24522	down	0.00170808
CSF2	4339.65	-1.26236	down	0.00205251
RGS1	1288.62	-1.28906	down	0.00559089
LST1	385.919	-1.29253	down	0.00120003
XCL2	7119.34	-1.31429	down	2.96403e-05
CCR4	1319.68	-1.40508	down	0.00567033
GNG8	645.991	-1.43131	down	7.46977e-06
SPINT2	254.102	-1.50057	down	0.00872894
LGALS1	1122.23	-1.54645	down	0.00357018
RUNX2-AS1	82.1667	-1.58406	down	0.0279967
GPR183	654.304	-1.61982	down	0.00559089
LINC00158	76.9445	-1.63743	down	0.0044054
HOMER2	222.657	-1.65447	down	0.0442431
RPS26	1400.35	-1.71892	down	0.0299461
BATF3	623.147	-1.72019	down	0.0299461
SOCAR	99.8099	-1.81979	down	0.00579187
CCL22	653.233	-1.86575	down	0.00872894
LOC105369313	266.71	-1.88861	down	0.00174172
LOC107986072	217.262	-2.01085	down	4.6191e-05
MAL	211.089	-2.07554	down	5.46489e-06
GBP6	48.5657	-2.1164	down	0.035897
FCER2	91.7018	-2.233	down	0.00567033
LOC105377022	123.405	-2.25874	down	0.0448426
LIF	130.559	-2.33748	down	0.000459342
LOC105379176	38.7673	-2.41473	down	0.00924016
IL4	72.3656	-2.74701	down	0.0299461
LOC105372651	40.8311	-2.94108	down	3.36376e-26
IL13	1104.75	-3.32122	down	0.00019232
LINC01281	31.1844	-3.60087	down	0.0366942
EEF1A2	22.55	-3.80065	down	0.0299461
CCL17	577.329	-4.42088	down	0.0490415
IL5	147.6	-4.81546	down	0.00174172

## Sheet: Sheet8
Supplementary table 9
DGEs FC>0.5, FDR<0.05
antiCD3+GSI+IL2 vs IL2+anti-CD3
Gene	baseMean	log2FoldChange	updown	FDR
LOC107985079	29.7344	5.17627	up	0.00520778
RPS28	621.476	3.5647	up	0.00517083
LIM2	163.263	2.74309	up	0.00419872
RMI2	200.25	2.27777	up	0.0256833
GNLY	5396.8	2.05643	up	0.00290896
ERAP2	1045.37	1.94452	up	5.30755e-05
BEST1	2663.03	1.85768	up	0.0256833
FTH1	3556.14	1.82888	up	0.0018518
NELL2	755.423	-1.69826	down	0.0180266
PECAM1	797.173	-1.86728	down	3.78299e-05
LOC283788	424.551	-1.91582	down	1.57615e-05
CCL4L1	1077.3	-1.93413	down	0.0256268
MT2A	1211.29	-2.08237	down	0.0231524
IKZF2	1332.25	-2.10507	down	0.000244572
SNHG5	2194.13	-2.20484	down	0.0431459
FCRL3	526.805	-2.22706	down	1.06155e-11
CCL17	508.977	-2.25774	down	0.0017614
CCL4L2	2698.76	-2.2596	down	0.00406519
LIF	317.538	-2.38247	down	0.000396383
TBC1D4	977.94	-2.54642	down	0.044275
JCHAIN	185.617	-3.0256	down	0.0256268
CXCL8	266.723	-4.45953	down	5.99257e-07
LOC389834	70.6968	-4.96813	down	0.00127238
MAFIP	162.114	-5.16956	down	0.0256833
IL17F	242.236	-8.35104	down	0.000396383
CCL3L1	307.497	-11.1379	down	0.000494712
CCL3L3	536.174	-11.9398	down	0.00584735
HLA-DRB5	509.165	-24.2258	down	0.0256268
